# Supplementary material for: The Tumor Immune Microenvironment Drives a Prognostic Relevance That Correlates with Bladder Cancer Subtypes
Source: Oxford University Press journal article supplement (doi:10.1158/2326-6066.cir-18-0758), 2019-04-15
Supplement: 23266066cir180758-sup-210873_3_supp_5346274_ppnh95.xlsx [file 23266066cir180758-sup-210873_3_supp_5346274_ppnh95.xlsx]

## Sheet: Tabelle1
Table S2. Reference Sequences – Nanostring analysis for subtyping (CCC-EMN cohort) and primer sequences for RT-qPCR.
Nanostring Reference Sequences
Customer Name	Accession	Position	Target Sequence	A Tm	B Tm	HUGO Gene	NSID	Tag
SDHA	NM_004168.1	231-330	TGGAGGGGCAGGCTTGCGAGCTGCATTTGGCCTTTCTGAGGCAGGGTTTAATACAGCATGTGTTACCAAGCTGTTTCCTACCAGGTCACACACTGTTGCA	82	80	SDHA	NM_004168.1:230	T001
HPRT1	NM_000194.1	241-340	TGTGATGAAGGAGATGGGAGGCCATCACATTGTAGCCCTCTGTGTGCTCAAGGGGGGCTATAAATTCTTTGCTGACCTGCTGGATTACATCAAAGCACTG	87	80	HPRT1	NM_000194.1:240	T002
KRT20	NM_019010.1	1246-1345	ACAGTCGTGCAAGAAGTAGTGGATGGCAAGGTCGTGTCATCTGAAGTCAAAGAGGTGGAAGAAAATATCTAAATAGCTACCAGAAGGAGATGCTGCTGAG	78	79	KRT20	NM_019010.1:1245	T004
KRT7	NM_005556.3	532-631	CCGCCTCCCAGACATCTTTGAGGCCCAGATTGCTGGCCTTCGGGGTCAGCTTGAGGCACTGCAGGTGGATGGGGGCCGCCTGGAGGCGGAGCTGCGGAGC	83	86	KRT7	NM_005556.3:531	T005
GATA3	NM_001002295.1	1692-1791	GTGCATGACTCACTGGAGGACTTCCCCAAGAACAGCTCGTTTAACCCGGCCGCCCTCTCCAGACACATGTCCTCCCTGAGCCACATCTCGCCCTTCAGCC	85	86	GATA3	NM_001002295.1:1691	T006
FGFR3	NM_022965.2	3171-3270	GGACCTGTATATTTGTAAAGCTATTTATGGGCCCCTGGCACTCTTGTTCCCACACCCCAACACTTCCAGCATTTAGCTGGCCACATGGCGGAGAGTTTTA	79	84	FGFR3	NM_022965.2:3170	T007
CYP2J2	NM_000775.2	371-470	GAAAAATGGATTGATTATGTCAAGTGGCCAGGCATGGAAGGAGCAAAGAAGGTTCACTCTGACAGCACTAAGGAACTTTGGTTTAGGAAAGAAGAGCTTA	84	81	CYP2J2	NM_000775.2:370	T008
ERBB2	NM_001005862.1	1256-1355	ACAGACACGTTTGAGTCCATGCCCAATCCCGAGGGCCGGTATACATTCGGCGCCAGCTGTGTGACTGCCTGTCCCTACAACTACCTTTCTACGGACGTGG	82	82	ERBB2	NM_001005862.1:1255	T009
ERBB3	NM_001005915.1	421-520	CCTGCAGTGGATTCGAGAAGTGACAGGCTATGTCCTCGTGGCCATGAATGAATTCTCTACTCTACCATTGCCCAACCTCCGCGTGGTGCGAGGGACCCAG	85	85	ERBB3	NM_001005915.1:420	T010
CDH1	NM_004360.2	536-635	GAATTGCTCACATTTCCCAACTCCTCTCCTGGCCTCAGAAGACAGAAGAGAGACTGGGTTATTCCTCCCATCAGCTGCCCAGAAAATGAAAAAGGCCCAT	80	78	CDH1	NM_004360.2:535	T011
MYH11	NM_001040113.1	921-1020	CTGCTAGAAAAATCACGGGCAATTCGCCAAGCCAGAGACGAGAGGACATTCCACATCTTTTACTACATGATTGCTGGAGCCAAGGAGAAGATGAGAAGTG	80	79	MYH11	NM_001040113.1:920	T012
ACTG2	NM_001615.3	1221-1320	GGGCCCTCCATTGTCCACAGGAAGTGCTTCTAAAGTCAGAACAGGTTCTCCAAGGATCCCCTCGAGACTACTCTGTTACCAGTCATGAAACATTAAAACC	83	82	ACTG2	NM_001615.3:1220	T013
CNN1	NM_001299.4	497-596	GTTTGAGAACACCAACCATACACAGGTGCAGTCCACCCTCCTGGCTTTGGCCAGCATGGCGAAGACGAAAGGAAACAAGGTGAACGTGGGAGTGAAGTAC	85	86	CNN1	NM_001299.4:496	T014
MFAP4	NM_002404.1	371-470	AACATGCACCTCCTGACACTGAAGCAGAAGTATGAGCTGCGAGTGGACTTGGAGGACTTTGAGAACAACACGGCCTATGCCAAGTACGCTGACTTCTCCA	82	82	MFAP4	NM_002404.1:370	T015
VIM	NM_003380.2	695-794	GAGGAGATGCTTCAGAGAGAGGAAGCCGAAAACACCCTGCAATCTTTCAGACAGGATGTTGACAATGCGTCTCTGGCACGTCTTGACCTTGAACGCAAAG	81	79	VIM	NM_003380.2:694	T016
ZEB2	NM_001171653.1	241-340	GTTTGTGTTTCCTGGAGTGGCCGAAAGAGATCAGTTCTAACCTGCTCTGCAGGAATAACGGTCCTGCCTCCCGACACTCTTGGCGAGGTTTTTGTACAGT	81	83	ZEB2	NM_001171653.1:240	T017
SNAI2	NM_003068.3	741-840	GCGTTTTCCAGACCCTGGTTGCTTCAAGGACACATTAGAACTCACACGGGGGAGAAGCCTTTTTCTTGCCCTCACTGCAACAGAGCATTTGCAGACAGGT	80	81	SNAI2	NM_003068.3:740	T018
CDH3	NM_001793.3	2006-2105	CCCTCGACCGTGAGGATGAGCAGTTTGTGAGGAACAACATCTATGAAGTCATGGTCTTGGCCATGGACAATGGAAGCCCTCCCACCACTGGCACGGGAAC	81	83	CDH3	NM_001793.3:2005	T019
CD44	NM_001001392.1	430-529	ACACCATGGACAAGTTTTGGTGGCACGCAGCCTGGGGACTCTGCCTCGTGCCGCTGAGCCTGGCGCAGATCGATTTGAATATAACCTGCCGCTTTGCAGG	85	85	CD44	NM_001001392.1:429	T020
KRT5	NM_000424.2	131-230	CTGGTTCTCTTGCTCCACCAGGAACAAGCCACCATGTCTCGCCAGTCAAGTGTGTCCTTCCGGAGCGGGGGCAGTCGTAGCTTCAGCACCGCCTCTGCCA	83	82	KRT5	NM_000424.2:130	T021
KRT6C	NM_173086.4	1827-1926	CTGGCCTCTAGTCTTCCCTGCTCTCCGAGGTAGAGCTGGGTATGGATGCTTAGTGCCCTCACTTCTCTCTGTCTATACCTGCCCCATCTGAGCACCCATT	85	85	KRT6C	NM_173086.4:1826	T022
KRT6B	NM_005555.3	2096-2195	ACCATCCTGCCCATTATAGCTACACTCAGGAGTTCTCATCTGACAAGTCAGTTGTCCTGATCTTCTCTTGCAGTGTCCCTGAATGGCAAGTGATGTACCT	83	81	KRT6B	NM_005555.3:2095	T023
RT-qPCR Primer Sequences
Gene Name	Probe Sequence	Forward Primer	Reverse Primer	Manufacturer
CD3Z	CAAAGCTCTGTGCCTCTGTAATCGGCA	CACCGCGGCCATCCT	AGTTTGGGATCCAGCAGGC	Eurogentec
CD8A	CAAATGTCCCCGGCCTGTGGTC	CAGGGAACCGAAGACGTGTT	TAGACGTATCTCGCCGAAAGG	Eurogentec
CD274	CAGAAGTGCCCTTTGCCTCCACTCAA	CCCTAATTTGAGGGTCAGTTCCT	CTCAGTCATGCAGAAAACAAATTGA	Eurogentec
PDCD1	TGAGCCCCAGCAACCAGACGG	CAACACATCGGAGAGCTTCGT	GGAAGGCGGCCAGCTT	Eurogentec
CXCL9	CCACTAACCGACTTGGCTGCTTCCTCTAG	AAAGGGAA CGGTGAAGTACTAAGC	AACTGGGCACCAATCATGCT	Eurogentec
CALM2	TCGCGTCTCGGAAACCGGTAGC	GAGCGAGCTGAGTGGTTGTG	AGTCAGTTGGTCAGCCATGCT	Eurogentec
RPL37A	TGGCTGGCGGTGCCTGGA	TGTGGTTCCTGCATGAAGACA	GTGACAGCGGAAGTGGTATTGTA	Eurogentec
B2M	AGTGGGATCGAGCATGTAAGCAGC	GTATGCCTGCCGTGTGAACC	GGCATCTTCAAACCTCCATGAT	Eurogentec
