# Supplementary material for: The Tumor Immune Microenvironment Drives a Prognostic Relevance That Correlates with Bladder Cancer Subtypes
Source: Oxford University Press journal article supplement (doi:10.1158/2326-6066.cir-18-0758), 2019-04-15
Supplement: 23266066cir180758-sup-210873_3_supp_5346275_pmz2mr.xlsx [file 23266066cir180758-sup-210873_3_supp_5346275_pmz2mr.xlsx]

## Sheet: CIBERSORT Correlation Matrix
Table S3. CIBERSORT – Spearman rank correlations between predicted immune cell populations in the TCGA cohort.
Spearman-Rank correlations of predicted immune cell populations in the TCGA cohort (CIBERSORT).
	B cells naive	B cells memory	Plasma cells	B cells_summary	T cells CD8	T cells CD4 naive	T cells CD4 memory resting	T cells CD4 memory activated	CD4_summary	T cells follicular helper	T cells regulatory (Tregs)	T cells gamma delta	NK cells resting	NK cells activated	NK cells SUM	Monocytes	Macrophages M0	Macrophages M1	Macrophages M2	Macrophages_Summary	Macrophages_M1_M2	Dendritic cells resting	Dendritic cells activated	Dendritic cells_Summary	Mast cells resting	Mast cells activated	Eosinophils	Neutrophils	Absolute score	Stromal TILs
B cells naive	1	0.3169	-0.0183	0.8949	0.1054	-0.0415	0.3441	0.0845	0.3443	0.2978	0.1667	-0.0171	0.1324	-0.0381	0.0989	-0.0122	0.1324	0.1248	0.0645	0.1325	0.0934	-0.0707	-0.073	-0.0972	0.0102	-0.0478	-0.0337	-0.033	0.3836	0.0746
B cells memory	0.3169	1	-0.0542	0.6702	0.0881	0.0163	0.1266	-0.0096	0.1172	0.1437	0.1129	-0.02	0.065	-0.012	0.0501	0.0055	0.0024	0.024	0.0415	0.0344	0.0421	-0.0038	0.0321	0.0256	0.0053	-0.044	-0.0258	-0.0347	0.2309	0.0597
Plasma cells	-0.0183	-0.0542	1	0.1289	0.0725	-0.0287	-0.0832	0.0291	-0.0741	0.0494	0.0368	-0.001	0.0177	0.047	0.0425	-0.0808	-0.0797	-0.0044	-0.0014	-0.0387	-0.0075	-0.0476	0.0702	0.0502	-0.0773	-0.0925	-0.0215	0.0651	0.0166	0.1909
B cells_summary	0.8949	0.6702	0.1289	1	0.1308	-0.031	0.3052	0.0627	0.3019	0.2994	0.1804	-0.0225	0.1332	-0.034	0.1025	-0.0274	0.0909	0.1058	0.0684	0.1114	0.0897	-0.0648	-0.0294	-0.0539	-0.0026	-0.0712	-0.0362	-0.0295	0.397	0.116
T cells CD8	0.1054	0.0881	0.0725	0.1308	1	-0.0985	0.1649	0.4882	0.2857	0.5658	0.2718	-0.0523	0.5177	0.2419	0.5882	0.1955	0.0407	0.612	0.4941	0.4966	0.6016	-0.0779	-0.036	-0.0635	0.167	-0.1167	-0.0241	0.0266	0.6904	0.4746
T cells CD4 naive	-0.0415	0.0163	-0.0287	-0.031	-0.0985	1	-0.2251	-0.0954	-0.0526	-0.134	-0.0787	-0.0249	-0.0928	-0.067	-0.1214	-0.0739	-0.1093	-0.164	-0.1492	-0.1825	-0.1743	-0.058	-0.0214	-0.0348	-0.1132	-0.0142	-0.0322	-0.0333	-0.1815	-0.1327
T cells CD4 memory resting	0.3441	0.1266	-0.0832	0.3052	0.1649	-0.2251	1	0.1648	0.935	0.3272	0.1839	0.0034	0.3325	0.0896	0.3474	0.1388	0.2278	0.4529	0.4166	0.4811	0.4874	0.0889	-0.0032	0.0246	0.2546	0.0783	0.0258	0.1809	0.6171	0.2994
T cells CD4 memory activated	0.0845	-0.0096	0.0291	0.0627	0.4882	-0.0954	0.1648	1	0.4438	0.3238	0.1075	-0.0284	0.5477	0.0839	0.5474	0.1193	0.1143	0.5245	0.3344	0.4068	0.4496	-0.0499	0.0775	0.0513	0.1543	-0.0569	0.0568	-0.041	0.5098	0.4065
CD4_summary	0.3443	0.1172	-0.0741	0.3019	0.2857	-0.0526	0.935	0.4438	1	0.3798	0.1863	-0.0111	0.4654	0.0888	0.4708	0.1497	0.2347	0.5572	0.463	0.5437	0.5616	0.0617	0.0153	0.0322	0.2568	0.0566	0.0351	0.1471	0.7002	0.378
T cells follicular helper	0.2978	0.1437	0.0494	0.2994	0.5658	-0.134	0.3272	0.3238	0.3798	1	0.2154	0.0703	0.4637	0.3139	0.5624	0.1339	0.1322	0.5573	0.3035	0.4059	0.4414	-0.0185	0.1848	0.1656	0.1463	-0.0334	0.0519	0.0316	0.6623	0.534
T cells regulatory (Tregs)	0.1667	0.1129	0.0368	0.1804	0.2718	-0.0787	0.1839	0.1075	0.1863	0.2154	1	0.0162	0.2612	0.0975	0.2683	0.2085	0.1608	0.2008	0.2595	0.2832	0.2676	0.025	0.0796	0.0768	0.0294	0.1469	-0.0466	-0.0329	0.404	0.2565
T cells gamma delta	-0.0171	-0.02	-0.001	-0.0225	-0.0523	-0.0249	0.0034	-0.0284	-0.0111	0.0703	0.0162	1	-0.0063	-0.0125	-0.0136	-0.0506	0.1216	-0.0004	0.0034	0.0566	0.0023	-0.0264	-0.062	-0.068	0.1287	-0.0337	-0.0096	-0.0162	0.0228	0.0047
NK cells resting	0.1324	0.065	0.0177	0.1332	0.5177	-0.0928	0.3325	0.5477	0.4654	0.4637	0.2612	-0.0063	1	-0.0348	0.9017	0.1451	0.2518	0.6396	0.3429	0.5079	0.5041	-0.0437	0.0539	0.0334	0.0603	0.1066	-0.0493	0.0258	0.6432	0.5025
NK cells activated	-0.0381	-0.012	0.047	-0.034	0.2419	-0.067	0.0896	0.0839	0.0888	0.3139	0.0975	-0.0125	-0.0348	1	0.3689	0.2273	-0.0237	0.2711	0.2178	0.1977	0.2618	0.0236	0.1696	0.1644	0.3302	-0.1893	0.1128	0.0545	0.2819	0.2393
NK cells SUM	0.0989	0.0501	0.0425	0.1025	0.5882	-0.1214	0.3474	0.5474	0.4708	0.5624	0.2683	-0.0136	0.9017	0.3689	1	0.2045	0.2236	0.7162	0.4176	0.5616	0.5866	-0.0235	0.1066	0.0889	0.1976	0.0092	0.0116	0.0587	0.7165	0.5684
Monocytes	-0.0122	0.0055	-0.0808	-0.0274	0.1955	-0.0739	0.1388	0.1193	0.1497	0.1339	0.2085	-0.0506	0.1451	0.2273	0.2045	1	-0.1489	0.1567	0.2416	0.1283	0.2398	0.0292	0.082	0.0787	0.2852	-0.0417	-0.0364	0.0254	0.2405	0.109
Macrophages M0	0.1324	0.0024	-0.0797	0.0909	0.0407	-0.1093	0.2278	0.1143	0.2347	0.1322	0.1608	0.1216	0.2518	-0.0237	0.2236	-0.1489	1	0.2882	0.2361	0.6475	0.2846	-0.1	-0.1559	-0.1836	-0.0678	0.2184	-0.0202	0.0356	0.4241	0.1652
Macrophages M1	0.1248	0.024	-0.0044	0.1058	0.612	-0.164	0.4529	0.5245	0.5572	0.5573	0.2008	-0.0004	0.6396	0.2711	0.7162	0.1567	0.2882	1	0.5378	0.7439	0.7855	0.0019	-0.0357	-0.0296	0.281	-0.0823	0.0285	0.0732	0.7921	0.6338
Macrophages M2	0.0645	0.0415	-0.0014	0.0684	0.4941	-0.1492	0.4166	0.3344	0.463	0.3035	0.2595	0.0034	0.3429	0.2178	0.4176	0.2416	0.2361	0.5378	1	0.8484	0.9421	0.0553	-0.1397	-0.1153	0.3738	-0.0738	-0.014	0.1104	0.7482	0.3917
Macrophages_Summary	0.1325	0.0344	-0.0387	0.1114	0.4966	-0.1825	0.4811	0.4068	0.5437	0.4059	0.2832	0.0566	0.5079	0.1977	0.5616	0.1283	0.6475	0.7439	0.8484	1	0.9135	-0.006	-0.1596	-0.1535	0.2758	0.0219	-0.0077	0.1032	0.8622	0.4946
Macrophages_M1_M2	0.0934	0.0421	-0.0075	0.0897	0.6016	-0.1743	0.4874	0.4496	0.5616	0.4414	0.2676	0.0023	0.5041	0.2618	0.5866	0.2398	0.2846	0.7855	0.9421	0.9135	1	0.0405	-0.1172	-0.0966	0.3792	-0.0841	-0.0018	0.1107	0.8587	0.5328
Dendritic cells resting	-0.0707	-0.0038	-0.0476	-0.0648	-0.0779	-0.058	0.0889	-0.0499	0.0617	-0.0185	0.025	-0.0264	-0.0437	0.0236	-0.0235	0.0292	-0.1	0.0019	0.0553	-0.006	0.0405	1	0.0034	0.3725	0.0532	0.0176	0.029	-0.0066	0.0129	0.0129
Dendritic cells activated	-0.073	0.0321	0.0702	-0.0294	-0.036	-0.0214	-0.0032	0.0775	0.0153	0.1848	0.0796	-0.062	0.0539	0.1696	0.1066	0.082	-0.1559	-0.0357	-0.1397	-0.1596	-0.1172	0.0034	1	0.9209	-0.0012	0.1705	-0.002	0.0074	0.0366	0.1476
Dendritic cells_Summary	-0.0972	0.0256	0.0502	-0.0539	-0.0635	-0.0348	0.0246	0.0513	0.0322	0.1656	0.0768	-0.068	0.0334	0.1644	0.0889	0.0787	-0.1836	-0.0296	-0.1153	-0.1535	-0.0966	0.3725	0.9209	1	0.0121	0.161	-0.0037	0.0028	0.034	0.1372
Mast cells resting	0.0102	0.0053	-0.0773	-0.0026	0.167	-0.1132	0.2546	0.1543	0.2568	0.1463	0.0294	0.1287	0.0603	0.3302	0.1976	0.2852	-0.0678	0.281	0.3738	0.2758	0.3792	0.0532	-0.0012	0.0121	1	-0.268	0.0355	0.0593	0.334	0.1681
Mast cells activated	-0.0478	-0.044	-0.0925	-0.0712	-0.1167	-0.0142	0.0783	-0.0569	0.0566	-0.0334	0.1469	-0.0337	0.1066	-0.1893	0.0092	-0.0417	0.2184	-0.0823	-0.0738	0.0219	-0.0841	0.0176	0.1705	0.161	-0.268	1	-0.0437	0.0946	0.0189	0.0558
Eosinophils	-0.0337	-0.0258	-0.0215	-0.0362	-0.0241	-0.0322	0.0258	0.0568	0.0351	0.0519	-0.0466	-0.0096	-0.0493	0.1128	0.0116	-0.0364	-0.0202	0.0285	-0.014	-0.0077	-0.0018	0.029	-0.002	-0.0037	0.0355	-0.0437	1	-0.021	-0.0026	0.0177
Neutrophils	-0.033	-0.0347	0.0651	-0.0295	0.0266	-0.0333	0.1809	-0.041	0.1471	0.0316	-0.0329	-0.0162	0.0258	0.0545	0.0587	0.0254	0.0356	0.0732	0.1104	0.1032	0.1107	-0.0066	0.0074	0.0028	0.0593	0.0946	-0.021	1	0.1261	0.0635
Absolute score	0.3836	0.2309	0.0166	0.397	0.6904	-0.1815	0.6171	0.5098	0.7002	0.6623	0.404	0.0228	0.6432	0.2819	0.7165	0.2405	0.4241	0.7921	0.7482	0.8622	0.8587	0.0129	0.0366	0.034	0.334	0.0189	-0.0026	0.1261	1	0.6021
Stromal TILs	0.0746	0.0597	0.1909	0.116	0.4746	-0.1327	0.2994	0.4065	0.378	0.534	0.2565	0.0047	0.5025	0.2393	0.5684	0.109	0.1652	0.6338	0.3917	0.4946	0.5328	0.0129	0.1476	0.1372	0.1681	0.0558	0.0177	0.0635	0.6021	1
Nonparametric: Spearman's ρ
Variable	by Variable		Spearman ρ	Prob>|ρ|
Macrophages_M1_M2	Macrophages M2		0.945	<.0001*
Dendritic cells_Summary	Dendritic cells activated		0.9136	<.0001*
Macrophages_M1_M2	Macrophages_Summary		0.9089	<.0001*
CD4_summary	T cells CD4 memory resting		0.8968	<.0001*
Absolute score	Macrophages_M1_M2		0.8624	<.0001*
Absolute score	Macrophages_Summary		0.8602	<.0001*
Macrophages_Summary	Macrophages M2		0.8592	<.0001*
Absolute score	Macrophages M2		0.7892	<.0001*
Macrophages_M1_M2	Macrophages M1		0.789	<.0001*
NK cells SUM	NK cells resting		0.7715	<.0001*
Absolute score	Macrophages M1		0.7448	<.0001*
Macrophages_Summary	Macrophages M1		0.7376	<.0001*
B cells_summary	B cells naive		0.7151	<.0001*
Absolute score	NK cells SUM		0.6688	<.0001*
Absolute score	T cells follicular helper		0.6522	<.0001*
Stromal TILs	Macrophages M1		0.6351	<.0001*
Stromal TILs	Absolute score		0.6299	<.0001*
Macrophages_Summary	Macrophages M0		0.6131	<.0001*
Macrophages M2	Macrophages M1		0.6129	<.0001*
Absolute score	CD4_summary		0.5924	<.0001*
Macrophages M1	NK cells SUM		0.5869	<.0001*
Macrophages M1	T cells follicular helper		0.5813	<.0001*
Absolute score	T cells CD8		0.5762	<.0001*
Stromal TILs	CD4_summary		0.58	<.0001*
Macrophages_M1_M2	NK cells SUM		0.5644	<.0001*
Stromal TILs	T cells follicular helper		0.5551	<.0001*
Absolute score	T cells CD4 memory resting		0.5536	<.0001*
Stromal TILs	Macrophages_M1_M2		0.5324	<.0001*
Macrophages_Summary	NK cells SUM		0.5302	<.0001*
T cells follicular helper	T cells CD8		0.5281	<.0001*
Macrophages M1	T cells CD8		0.5249	<.0001*
Stromal TILs	NK cells SUM		0.5178	<.0001*
B cells_summary	Plasma cells		0.5099	<.0001*
Macrophages_M1_M2	T cells CD8		0.5025	<.0001*
NK cells SUM	T cells follicular helper		0.4984	<.0001*
Stromal TILs	Macrophages_Summary		0.4961	<.0001*
Stromal TILs	T cells CD8		0.4898	<.0001*
Macrophages_M1_M2	T cells follicular helper		0.4856	<.0001*
Absolute score	NK cells resting		0.4838	<.0001*
Absolute score	T cells CD4 memory activated		0.4776	<.0001*
Macrophages_M1_M2	CD4_summary		0.4744	<.0001*
NK cells SUM	T cells CD4 memory activated		0.4673	<.0001*
Macrophages M2	NK cells SUM		0.4587	<.0001*
NK cells resting	T cells CD4 memory activated		0.4557	<.0001*
Macrophages_Summary	CD4_summary		0.4521	<.0001*
Macrophages M2	T cells CD8		0.4484	<.0001*
NK cells SUM	CD4_summary		0.4478	<.0001*
B cells_summary	B cells memory		0.4437	<.0001*
T cells CD4 memory activated	T cells CD8		0.4404	<.0001*
Macrophages_M1_M2	T cells CD4 memory resting		0.4367	<.0001*
Macrophages_Summary	T cells CD4 memory resting		0.432	<.0001*
Macrophages M1	T cells CD4 memory activated		0.4317	<.0001*
Stromal TILs	Macrophages M2		0.4303	<.0001*
Stromal TILs	NK cells resting		0.4267	<.0001*
Macrophages_M1_M2	T cells CD4 memory activated		0.4242	<.0001*
Macrophages_Summary	T cells follicular helper		0.4225	<.0001*
Macrophages M1	CD4_summary		0.4189	<.0001*
Macrophages_Summary	T cells CD8		0.4186	<.0001*
Macrophages M2	CD4_summary		0.4129	<.0001*
Macrophages M1	NK cells resting		0.401	<.0001*
NK cells SUM	T cells CD8		0.3959	<.0001*
Absolute score	Macrophages M0		0.3953	<.0001*
Absolute score	T cells regulatory (Tregs)		0.3905	<.0001*
Macrophages_Summary	T cells CD4 memory activated		0.3877	<.0001*
CD4_summary	T cells CD4 memory activated		0.3869	<.0001*
Macrophages_M1_M2	NK cells resting		0.3827	<.0001*
Macrophages M2	T cells CD4 memory resting		0.3826	<.0001*
Stromal TILs	T cells CD4 memory activated		0.3817	<.0001*
Macrophages_Summary	NK cells resting		0.3791	<.0001*
NK cells resting	CD4_summary		0.3754	<.0001*
Macrophages M2	T cells CD4 memory activated		0.373	<.0001*
Macrophages M1	T cells CD4 memory resting		0.3708	<.0001*
T cells follicular helper	T cells CD4 memory activated		0.3704	<.0001*
Macrophages M2	T cells follicular helper		0.3685	<.0001*
NK cells SUM	T cells CD4 memory resting		0.3622	<.0001*
Mast cells resting	NK cells activated		0.3595	<.0001*
Dendritic cells_Summary	Dendritic cells resting		0.3579	<.0001*
Mast cells resting	Macrophages_M1_M2		0.3552	<.0001*
NK cells resting	T cells follicular helper		0.3486	<.0001*
T cells follicular helper	CD4_summary		0.3369	<.0001*
NK cells SUM	NK cells activated		0.3335	<.0001*
Absolute score	Mast cells resting		0.33	<.0001*
Absolute score	B cells_summary		0.326	<.0001*
Mast cells resting	Macrophages M2		0.3213	<.0001*
Mast cells resting	Macrophages M1		0.3109	<.0001*
Macrophages M2	NK cells resting		0.31	<.0001*
Macrophages_M1_M2	Macrophages M0		0.3066	<.0001*
Macrophages M1	Macrophages M0		0.3049	<.0001*
T cells follicular helper	T cells CD4 memory resting		0.294	<.0001*
Macrophages_Summary	T cells regulatory (Tregs)		0.2887	<.0001*
Stromal TILs	T cells CD4 memory resting		0.2857	<.0001*
Macrophages M2	T cells regulatory (Tregs)		0.2841	<.0001*
Mast cells resting	Macrophages_Summary		0.2827	<.0001*
Macrophages_M1_M2	T cells regulatory (Tregs)		0.2801	<.0001*
Stromal TILs	T cells regulatory (Tregs)		0.275	<.0001*
NK cells SUM	T cells regulatory (Tregs)		0.2744	<.0001*
Absolute score	B cells naive		0.2737	<.0001*
NK cells resting	T cells CD4 memory resting		0.2724	<.0001*
Macrophages M2	Macrophages M0		0.2649	<.0001*
Absolute score	NK cells activated		0.2642	<.0001*
Monocytes	T cells CD8		0.2641	<.0001*
NK cells resting	T cells regulatory (Tregs)		0.2595	<.0001*
NK cells resting	T cells CD8		0.2559	<.0001*
NK cells activated	T cells follicular helper		0.2553	<.0001*
T cells CD8	B cells_summary		0.2488	<.0001*
Neutrophils	Mast cells activated		0.2377	<.0001*
Macrophages_M1_M2	B cells_summary		0.2373	<.0001*
Absolute score	Monocytes		0.2356	<.0001*
Macrophages M2	B cells_summary		0.2336	<.0001*
Macrophages M1	NK cells activated		0.2268	<.0001*
Macrophages M0	NK cells SUM		0.2263	<.0001*
Macrophages_M1_M2	B cells naive		0.2228	<.0001*
Macrophages_M1_M2	NK cells activated		0.2215	<.0001*
T cells follicular helper	B cells_summary		0.2166	<.0001*
Macrophages_Summary	B cells naive		0.2159	<.0001*
Mast cells resting	Monocytes		0.2159	<.0001*
Macrophages M0	T cells CD4 memory resting		0.2143	<.0001*
T cells regulatory (Tregs)	T cells CD8		0.2106	<.0001*
Mast cells resting	T cells follicular helper		0.2106	<.0001*
Macrophages M2	B cells naive		0.2074	<.0001*
Stromal TILs	Plasma cells		0.2068	<.0001*
Stromal TILs	B cells_summary		0.2056	<.0001*
Monocytes	T cells follicular helper		0.2034	<.0001*
Mast cells resting	CD4_summary		0.2024	<.0001*
Macrophages_Summary	B cells_summary		0.2019	<.0001*
Macrophages M0	NK cells resting		0.2012	<.0001*
Macrophages M1	T cells regulatory (Tregs)		0.2005	<.0001*
Macrophages M1	B cells_summary		0.2002	<.0001*
Mast cells resting	T cells CD4 memory activated		0.2002	<.0001*
Mast cells resting	NK cells SUM		0.2	<.0001*
Mast cells resting	T cells CD4 memory resting		0.1998	<.0001*
Macrophages M1	B cells naive		0.1988	<.0001*
T cells CD4 memory activated	B cells_summary		0.198	<.0001*
Monocytes	T cells regulatory (Tregs)		0.1955	<.0001*
Macrophages M0	CD4_summary		0.192	<.0001*
T cells CD4 memory activated	B cells naive		0.1891	0.0001*
T cells regulatory (Tregs)	T cells follicular helper		0.188	0.0001*
T cells CD4 memory activated	T cells CD4 memory resting		0.1876	0.0001*
Monocytes	NK cells activated		0.186	0.0002*
NK cells activated	T cells CD8		0.1842	0.0002*
Mast cells resting	T cells CD8		0.1828	0.0002*
Macrophages_Summary	NK cells activated		0.18	0.0003*
NK cells SUM	B cells_summary		0.1683	0.0006*
T cells regulatory (Tregs)	B cells_summary		0.1666	0.0007*
T cells CD8	Plasma cells		0.1629	0.0010*
T cells CD8	B cells naive		0.1626	0.0010*
NK cells resting	B cells_summary		0.1626	0.0010*
Stromal TILs	Macrophages M0		0.1616	0.0011*
Macrophages_M1_M2	Monocytes		0.1608	0.0011*
T cells regulatory (Tregs)	T cells CD4 memory resting		0.1577	0.0014*
Macrophages M2	NK cells activated		0.1563	0.0016*
Monocytes	NK cells SUM		0.1552	0.0017*
CD4_summary	B cells naive		0.155	0.0017*
T cells follicular helper	B cells naive		0.1519	0.0021*
Macrophages M0	T cells follicular helper		0.1505	0.0023*
T cells regulatory (Tregs)	CD4_summary		0.1469	0.0030*
CD4_summary	T cells CD8		0.1465	0.0031*
Mast cells activated	NK cells resting		0.143	0.0038*
Monocytes	CD4_summary		0.1427	0.0039*
Stromal TILs	NK cells activated		0.1425	0.0040*
T cells follicular helper	B cells memory		0.1417	0.0042*
Mast cells activated	Macrophages M0		0.1412	0.0043*
Monocytes	T cells CD4 memory resting		0.1408	0.0044*
Macrophages M2	Plasma cells		0.1405	0.0045*
Absolute score	B cells memory		0.1401	0.0046*
T cells CD4 memory resting	B cells naive		0.139	0.0050*
Stromal TILs	Mast cells resting		0.1382	0.0052*
T cells regulatory (Tregs)	B cells naive		0.1362	0.0059*
CD4_summary	B cells_summary		0.1339	0.0068*
NK cells resting	B cells naive		0.1337	0.0069*
Mast cells activated	Dendritic cells activated		0.1322	0.0076*
Macrophages_M1_M2	Plasma cells		0.1298	0.0088*
NK cells SUM	B cells naive		0.1287	0.0093*
Macrophages M2	Monocytes		0.1278	0.0099*
Macrophages M0	T cells regulatory (Tregs)		0.126	0.0109*
T cells CD4 memory resting	B cells_summary		0.1243	0.0121*
Mast cells resting	T cells gamma delta		0.124	0.0123*
Absolute score	Plasma cells		0.1219	0.0139*
T cells CD4 memory resting	B cells memory		0.121	0.0146*
T cells regulatory (Tregs)	T cells CD4 memory activated		0.1189	0.0164*
Dendritic cells_Summary	T cells follicular helper		0.1184	0.0169*
Mast cells activated	T cells regulatory (Tregs)		0.1181	0.0172*
T cells regulatory (Tregs)	B cells memory		0.1172	0.0180*
Macrophages M1	Monocytes		0.1169	0.0183*
Dendritic cells activated	B cells memory		0.1162	0.0190*
Stromal TILs	Monocytes		0.1149	0.0204*
B cells memory	B cells naive		0.1131	0.0225*
CD4_summary	B cells memory		0.1115	0.0245*
Macrophages M0	B cells naive		0.1104	0.0260*
Absolute score	Neutrophils		0.1102	0.0262*
Neutrophils	T cells CD4 memory resting		0.1076	0.0300*
Mast cells activated	Dendritic cells_Summary		0.106	0.0325*
Macrophages M1	Plasma cells		0.1057	0.0330*
Dendritic cells_Summary	B cells memory		0.1055	0.0334*
Stromal TILs	B cells naive		0.1026	0.0385*
NK cells SUM	Plasma cells		0.1003	0.0432*
Dendritic cells resting	T cells CD4 memory resting		0.0988	0.0463*
Macrophages M0	T cells CD4 memory activated		0.0963	0.0523
NK cells resting	Plasma cells		0.0962	0.0525
T cells CD4 memory activated	Plasma cells		0.0956	0.0539
Stromal TILs	Dendritic cells_Summary		0.0917	0.0646
Stromal TILs	Neutrophils		0.0908	0.0674
T cells CD4 memory resting	T cells CD8		0.0899	0.0702
Dendritic cells activated	T cells regulatory (Tregs)		0.0893	0.072
Dendritic cells resting	Monocytes		0.0883	0.0752
NK cells activated	T cells CD4 memory resting		0.0871	0.0793
Dendritic cells activated	T cells follicular helper		0.0865	0.0812
Eosinophils	Dendritic cells resting		0.0861	0.0829
Dendritic cells_Summary	T cells regulatory (Tregs)		0.0844	0.089
Eosinophils	NK cells activated		0.084	0.0906
Neutrophils	Dendritic cells activated		0.0838	0.0912
Macrophages_Summary	Plasma cells		0.0838	0.0913
Plasma cells	B cells naive		0.0834	0.093
Monocytes	B cells memory		0.0811	0.1023
Macrophages_Summary	Monocytes		0.0802	0.1062
T cells CD8	B cells memory		0.0796	0.109
Dendritic cells resting	CD4_summary		0.079	0.1114
Neutrophils	Macrophages_Summary		0.0779	0.1166
Neutrophils	CD4_summary		0.0772	0.1197
T cells gamma delta	T cells follicular helper		0.0764	0.1239
Monocytes	NK cells resting		0.0748	0.1319
Neutrophils	Macrophages_M1_M2		0.0741	0.1355
Eosinophils	Macrophages M1		0.0719	0.1475
Neutrophils	Dendritic cells_Summary		0.0714	0.1506
Dendritic cells resting	Macrophages_M1_M2		0.0705	0.156
Dendritic cells resting	Macrophages M2		0.0702	0.1575
Mast cells resting	B cells_summary		0.0676	0.1736
Stromal TILs	Dendritic cells activated		0.0673	0.1756
Neutrophils	Macrophages M2		0.0668	0.1789
Mast cells resting	Dendritic cells resting		0.0666	0.1798
T cells follicular helper	Plasma cells		0.065	0.1903
Eosinophils	Mast cells resting		0.0634	0.2019
Eosinophils	T cells follicular helper		0.0616	0.2147
Monocytes	T cells CD4 memory activated		0.0602	0.2256
NK cells activated	CD4_summary		0.0598	0.2285
Mast cells resting	B cells naive		0.0582	0.2415
Stromal TILs	B cells memory		0.0576	0.2462
Dendritic cells_Summary	Monocytes		0.0563	0.2575
Dendritic cells activated	Dendritic cells resting		0.0561	0.2588
Mast cells resting	B cells memory		0.0559	0.2604
Macrophages M0	B cells_summary		0.0524	0.2914
Dendritic cells_Summary	NK cells activated		0.0476	0.3381
Dendritic cells resting	T cells regulatory (Tregs)		0.0468	0.3464
Neutrophils	Macrophages M0		0.0466	0.3479
Absolute score	Dendritic cells resting		0.0454	0.3605
Macrophages M1	T cells gamma delta		0.043	0.3875
Neutrophils	NK cells resting		0.0428	0.3897
T cells gamma delta	T cells regulatory (Tregs)		0.0421	0.3972
Macrophages M0	T cells gamma delta		0.0421	0.3975
Absolute score	T cells gamma delta		0.0417	0.4014
Absolute score	Dendritic cells_Summary		0.0393	0.4291
Mast cells activated	T cells CD4 naive		0.0373	0.4528
T cells regulatory (Tregs)	Plasma cells		0.0366	0.4618
Stromal TILs	T cells gamma delta		0.0361	0.4671
Stromal TILs	Dendritic cells resting		0.0361	0.4682
Dendritic cells resting	Macrophages M1		0.036	0.4694
Neutrophils	Macrophages M1		0.0356	0.4736
T cells CD4 naive	B cells memory		0.0355	0.4748
Dendritic cells activated	Plasma cells		0.035	0.4808
Neutrophils	T cells CD8		0.0349	0.4826
Macrophages_Summary	T cells gamma delta		0.0345	0.4872
Stromal TILs	Eosinophils		0.0344	0.4883
Dendritic cells activated	NK cells activated		0.0332	0.5039
Macrophages M0	NK cells activated		0.0327	0.5103
Macrophages M2	B cells memory		0.032	0.5201
Macrophages M2	T cells gamma delta		0.0311	0.5313
Dendritic cells resting	T cells follicular helper		0.0301	0.5453
Macrophages_M1_M2	T cells gamma delta		0.0292	0.5569
Dendritic cells activated	T cells CD4 naive		0.028	0.5737
NK cells activated	Plasma cells		0.0279	0.5743
Neutrophils	Plasma cells		0.0275	0.5796
NK cells resting	B cells memory		0.0246	0.6206
NK cells activated	T cells regulatory (Tregs)		0.0226	0.6493
Eosinophils	T cells CD4 memory activated		0.0225	0.6511
Dendritic cells resting	NK cells activated		0.0222	0.6559
Dendritic cells activated	Monocytes		0.022	0.6579
Macrophages_M1_M2	B cells memory		0.0203	0.6831
NK cells SUM	B cells memory		0.0198	0.6903
Dendritic cells_Summary	NK cells resting		0.0192	0.6987
Neutrophils	T cells regulatory (Tregs)		0.0191	0.7015
Mast cells activated	T cells CD4 memory resting		0.0171	0.7303
Neutrophils	Monocytes		0.0165	0.7402
T cells gamma delta	Plasma cells		0.0165	0.7405
Absolute score	Eosinophils		0.0161	0.7454
Macrophages M0	T cells CD8		0.0152	0.7599
Monocytes	B cells naive		0.0139	0.7791
T cells CD4 memory activated	B cells memory		0.0139	0.7803
Eosinophils	CD4_summary		0.0132	0.7913
Neutrophils	Dendritic cells resting		0.0126	0.8007
Dendritic cells_Summary	T cells CD4 memory resting		0.0123	0.8039
Eosinophils	Macrophages_M1_M2		0.0112	0.8211
Dendritic cells_Summary	CD4_summary		0.0111	0.8228
Eosinophils	NK cells SUM		0.0092	0.8533
Neutrophils	NK cells SUM		0.0086	0.8632
Eosinophils	Macrophages M2		0.0072	0.8854
Dendritic cells_Summary	Plasma cells		0.0072	0.8856
Macrophages_Summary	B cells memory		0.0066	0.8947
Dendritic cells resting	B cells memory		0.005	0.9198
NK cells activated	B cells_summary		0.005	0.9206
Dendritic cells activated	NK cells resting		0.0044	0.9291
Eosinophils	Macrophages_Summary		0.0031	0.9497
Dendritic cells_Summary	T cells CD4 naive		0.0031	0.9501
Mast cells resting	T cells regulatory (Tregs)		0.0028	0.9547
Mast cells activated	NK cells SUM		0.0023	0.9635
Stromal TILs	Mast cells activated		0.0023	0.9637
Dendritic cells resting	Macrophages_Summary		0.0006	0.9904
Absolute score	Mast cells activated		-0.0005	0.9924
Dendritic cells_Summary	NK cells SUM		-0.0009	0.9848
Monocytes	B cells_summary		-0.0017	0.9726
Eosinophils	Macrophages M0		-0.0018	0.9706
Dendritic cells resting	NK cells SUM		-0.0021	0.967
Neutrophils	T cells CD4 naive		-0.0026	0.9582
Mast cells activated	CD4_summary		-0.0028	0.9554
Absolute score	Dendritic cells activated		-0.0039	0.9368
NK cells activated	T cells gamma delta		-0.0040	0.9359
Neutrophils	T cells follicular helper		-0.0059	0.9059
Macrophages M1	B cells memory		-0.0089	0.858
Eosinophils	T cells gamma delta		-0.0096	0.8467
Eosinophils	Dendritic cells_Summary		-0.0101	0.839
Eosinophils	Plasma cells		-0.0110	0.8255
Eosinophils	T cells CD4 memory resting		-0.0111	0.8234
NK cells activated	B cells naive		-0.0116	0.8157
T cells gamma delta	B cells naive		-0.0117	0.8133
NK cells SUM	T cells gamma delta		-0.0118	0.8118
Plasma cells	B cells memory		-0.0155	0.7553
NK cells resting	T cells gamma delta		-0.0155	0.7553
Neutrophils	NK cells activated		-0.0163	0.7436
T cells gamma delta	B cells_summary		-0.0173	0.7284
T cells CD4 naive	B cells_summary		-0.0197	0.6921
Dendritic cells activated	B cells_summary		-0.0203	0.6824
Mast cells resting	Plasma cells		-0.0206	0.6782
Neutrophils	T cells gamma delta		-0.0239	0.6313
Eosinophils	Dendritic cells activated		-0.0245	0.6219
Mast cells activated	T cells follicular helper		-0.0246	0.621
Eosinophils	T cells CD8		-0.0259	0.6027
Mast cells resting	NK cells resting		-0.0268	0.5894
Mast cells resting	Dendritic cells_Summary		-0.0269	0.5881
T cells gamma delta	T cells CD4 memory resting		-0.0275	0.5806
Dendritic cells resting	NK cells resting		-0.0280	0.5732
T cells gamma delta	T cells CD4 naive		-0.0288	0.5624
Neutrophils	Eosinophils		-0.0309	0.5345
Dendritic cells activated	NK cells SUM		-0.0310	0.5331
Dendritic cells resting	T cells gamma delta		-0.0325	0.5127
NK cells activated	B cells memory		-0.0326	0.5125
Mast cells activated	Monocytes		-0.0336	0.4991
Macrophages M0	B cells memory		-0.0340	0.4943
T cells CD4 naive	B cells naive		-0.0354	0.4759
T cells gamma delta	T cells CD4 memory activated		-0.0360	0.4683
T cells gamma delta	B cells memory		-0.0367	0.4599
T cells CD4 naive	Plasma cells		-0.0372	0.4545
Eosinophils	T cells CD4 naive		-0.0373	0.4533
Mast cells activated	Macrophages_Summary		-0.0381	0.4428
Eosinophils	Monocytes		-0.0383	0.4409
Neutrophils	T cells CD4 memory activated		-0.0384	0.4403
Dendritic cells resting	T cells CD4 memory activated		-0.0385	0.4383
Neutrophils	B cells_summary		-0.0390	0.4328
Mast cells activated	Dendritic cells resting		-0.0406	0.4143
T cells gamma delta	CD4_summary		-0.0412	0.4074
Eosinophils	T cells regulatory (Tregs)		-0.0414	0.4049
Mast cells activated	T cells gamma delta		-0.0414	0.4047
Neutrophils	B cells memory		-0.0425	0.3926
Mast cells resting	Macrophages M0		-0.0429	0.3882
Dendritic cells activated	CD4_summary		-0.0432	0.3849
Dendritic cells activated	T cells CD4 memory resting		-0.0465	0.3491
NK cells activated	T cells CD4 memory activated		-0.0466	0.3484
Eosinophils	B cells memory		-0.0475	0.3387
Macrophages M0	Plasma cells		-0.0497	0.3174
Eosinophils	NK cells resting		-0.0526	0.29
Mast cells activated	B cells memory		-0.0530	0.2864
Eosinophils	Mast cells activated		-0.0536	0.2807
Dendritic cells resting	Plasma cells		-0.0550	0.2686
Eosinophils	B cells_summary		-0.0598	0.2285
Mast cells resting	Dendritic cells activated		-0.0619	0.2126
Monocytes	T cells gamma delta		-0.0629	0.2057
CD4_summary	T cells CD4 naive		-0.0649	0.191
NK cells resting	T cells CD4 naive		-0.0654	0.188
T cells CD4 memory resting	Plasma cells		-0.0704	0.1561
CD4_summary	Plasma cells		-0.0722	0.1461
Dendritic cells_Summary	T cells CD4 memory activated		-0.0758	0.1268
Dendritic cells resting	T cells CD4 naive		-0.0764	0.1239
Dendritic cells_Summary	B cells_summary		-0.0767	0.1226
Eosinophils	B cells naive		-0.0788	0.1125
Dendritic cells activated	T cells CD4 memory activated		-0.0794	0.1095
Neutrophils	B cells naive		-0.0814	0.1011
Monocytes	T cells CD4 naive		-0.0852	0.0859
Mast cells activated	B cells naive		-0.0854	0.0854
Dendritic cells_Summary	T cells CD8		-0.0856	0.0846
Dendritic cells activated	T cells gamma delta		-0.0881	0.0758
Dendritic cells resting	T cells CD8		-0.0887	0.0738
Dendritic cells_Summary	Macrophages M2		-0.0930	0.0609
Dendritic cells activated	T cells CD8		-0.0936	0.0593
Dendritic cells_Summary	T cells gamma delta		-0.0937	0.0589
Dendritic cells_Summary	Macrophages_M1_M2		-0.0959	0.0533
Mast cells activated	Plasma cells		-0.0966	0.0514
Neutrophils	Mast cells resting		-0.0978	0.0486*
Monocytes	Plasma cells		-0.1001	0.0436*
T cells gamma delta	T cells CD8		-0.1015	0.0407*
Mast cells activated	Macrophages M2		-0.1039	0.0361*
NK cells activated	T cells CD4 naive		-0.1128	0.0228*
Mast cells activated	B cells_summary		-0.1164	0.0189*
T cells regulatory (Tregs)	T cells CD4 naive		-0.1190	0.0163*
Mast cells activated	T cells CD8		-0.1241	0.0122*
Mast cells activated	T cells CD4 memory activated		-0.1249	0.0117*
Mast cells activated	Macrophages_M1_M2		-0.1283	0.0096*
Dendritic cells_Summary	Macrophages M1		-0.1289	0.0092*
Macrophages M0	T cells CD4 naive		-0.1310	0.0081*
Dendritic cells resting	B cells_summary		-0.1352	0.0063*
Dendritic cells activated	B cells naive		-0.1381	0.0053*
Dendritic cells resting	B cells naive		-0.1389	0.0050*
T cells CD4 memory activated	T cells CD4 naive		-0.1398	0.0047*
Dendritic cells resting	Macrophages M0		-0.1414	0.0043*
Dendritic cells activated	Macrophages M2		-0.1448	0.0034*
NK cells SUM	T cells CD4 naive		-0.1567	0.0015*
Dendritic cells activated	Macrophages_M1_M2		-0.1590	0.0013*
Mast cells activated	Macrophages M1		-0.1680	0.0007*
Mast cells resting	T cells CD4 naive		-0.1767	0.0003*
Dendritic cells_Summary	Macrophages_Summary		-0.1789	0.0003*
Dendritic cells_Summary	B cells naive		-0.1857	0.0002*
Dendritic cells activated	Macrophages M1		-0.1889	0.0001*
Stromal TILs	T cells CD4 naive		-0.1909	0.0001*
Macrophages M0	Monocytes		-0.1915	0.0001*
NK cells activated	NK cells resting		-0.2071	<.0001*
Macrophages M2	T cells CD4 naive		-0.2106	<.0001*
T cells CD4 naive	T cells CD8		-0.2124	<.0001*
Dendritic cells activated	Macrophages M0		-0.2225	<.0001*
Dendritic cells activated	Macrophages_Summary		-0.2240	<.0001*
Mast cells activated	NK cells activated		-0.2264	<.0001*
Macrophages M1	T cells CD4 naive		-0.2391	<.0001*
Dendritic cells_Summary	Macrophages M0		-0.2394	<.0001*
Macrophages_M1_M2	T cells CD4 naive		-0.2464	<.0001*
T cells follicular helper	T cells CD4 naive		-0.2511	<.0001*
Macrophages_Summary	T cells CD4 naive		-0.2511	<.0001*
Absolute score	T cells CD4 naive		-0.3066	<.0001*
T cells CD4 memory resting	T cells CD4 naive		-0.3231	<.0001*
Mast cells activated	Mast cells resting		-0.4532	<.0001*
