# Supplementary material for: The Tumor Immune Microenvironment Drives a Prognostic Relevance That Correlates with Bladder Cancer Subtypes
Source: Oxford University Press journal article supplement (doi:10.1158/2326-6066.cir-18-0758), 2019-04-15
Supplement: 23266066cir180758-sup-210873_3_supp_5346372_pmz2s2.xlsx [file 23266066cir180758-sup-210873_3_supp_5346372_pmz2s2.xlsx]

## Sheet: Summary
Table S6. Multivariable cox regression models of survival analyses.
The following tables summarize all remaining independent risk factors for disease specific survival (Figure 1) and overall survival (Figure 2,3,5,6 and 7) identified by multivariable Cox-Regression analyses.
Detailed multivariable model calculations for each survival analysis can be seen in the subsequent excel sheet tables. In these tables all included factors and their log-value are displayed.
Figure 1- Immune Phenotypes: Independent risk factors - Multivariable Cox-Regression (Disease specific survival)						CCC-EMN-Cohort (Figure 1 and 2)
Variable A	Variable B	Hazard Ratio	p-Value	Lower 95%	Upper 95%
Inflamed high	Uninflamed	0.150387	<.0001	0.050773	0.359253
Inflamed high	Evasion Phenotype	0.17647	0.0012	0.0536889	0.506867
Inflamed high	Inflamed low	0.308122	0.0143	0.0995198	0.799382
Inflamed low	Uninflamed	0.488076	0.0117	0.266782	0.855832
pT2	pT4	0.350367	0.0022	0.175278	0.685879
pT3	pT4	0.354929	0.0006	0.199406	0.636908
pN0	pNX	0.291539	0.0016	0.148591	0.607736
pN+	pNX	0.417949	0.0246	0.205565	0.889357
Figure 2- sTILs Tertiles: Independent risk factors - Multivariable Cox-Regression (Disease specific survival)
Variable A	Variable B	Hazard Ratio	p-Value	Lower 95%	Upper 95%
T3	T1	0.204836	<.0001	0.0913621	0.414809
T3	T2	0.314545	0.0011	0.139738	0.640858
pT2	pT4	0.32829	0.0013	0.163537	0.645365
pT3	pT4	0.420229	0.0034	0.240291	0.745202
pN0	pNX	0.249087	0.0004	0.128249	0.514497
pN+	pNX	0.416708	0.0224	0.207364	0.877594
Figure 3- sTILs Tertile Split: Independent risk factors - Multivariable Cox-Regression (Overall survival)						Entire TCGA-Cohort (Figure 3)
Variable A	Variable B	Hazard Ratio	p-Value	Lower 95%	Upper 95%
T2	T1	0.565908	0.0028	0.386053	0.823123
T3	T1	0.432954	<.0001	0.283653	0.654111
pT2	pT4	0.40426	0.001	0.237466	0.690028
pT2	pT3	0.625738	0.0208	0.411176	0.932545
Adjuvant Chemotherapy	No Adjuvant Chemotherapy	0.422411	<.0001	0.269774	0.642612
L0	LX	0.594508	0.0177	0.384438	0.913912
L0	L1	0.635585	0.0411	0.407962	0.981899
pN0	pN+	0.594611	0.0068	0.408138	0.865985
Luminal Papillary	Neuronal	0.322036	0.0014	0.170149	0.609507
Luminal Papillary	Basal Squamous	0.425209	<.0001	0.275595	0.656044
Luminal Infiltrated	Neuronal	0.487833	0.0372	0.256913	0.926308
Luminal Infiltrated	Basal Squamous	0.644123	0.037	0.423481	0.979724
Age		3.8351	<.0001	1.56038	9.66518
Figure 5- sTILs Tertile Split: Independent risk factors - Multivariable Cox-Regression (Overall survival)						Basal TCGA-Cohort (Figure 5)
Variable A	Variable B	Hazard Ratio	p-Value	Lower 95%	Upper 95%
T2	T1	0.337218	0.0003	0.179634	0.613259
T3	T1	0.263706	<.0001	0.14559	0.464718
Adjuvant Chemotherapy	No Adjuvant Chemotherapy	0.438002	0.0268	0.18575	0.914494
Age		4.89134	<.0001	1.40341	18.5672
Figure 6- sTILs Tertile Split: Independent risk factors - Multivariable Cox-Regression (Overall survival)						LuminalTCGA-Cohort (Figure 5)
Variable A	Variable B	Hazard Ratio	p-Value	Lower 95%	Upper 95%
T3	T1	0.483745	0.007	0.280919	0.820126
pT2	pT4	0.296893	0.0008	0.146136	0.598373
pT2	pTX	0.339126	0.0235	0.145305	0.855207
pT3	pT4	0.494738	0.0169	0.289828	0.876258
L0	L1	0.257063	<.0001	0.134063	0.462613
L0	LX	0.311064	0.0004	0.155396	0.595639
Age		6.23146	<.0001	1.66359	24.6036
Figure 7- sTILs Tertile Split: Independent risk factors - Multivariable Cox-Regression (Overall survival)						Merged ADJUVANT Chemotherapy Cohort (Figure 7)
Variable A	Variable B	Hazard Ratio	p-Value	Lower 95%	Upper 95%
T3	T1	0.221875	0.0001	0.101358	0.470698
T3	T2	0.313181	0.0009	0.148809	0.625803
pN0	pN+	0.490638	0.0259	0.246503	0.920221
Age		2.82223	<.0001	0.861375	9.54508
Figure S2C- Tertiary Lymphoid Distance - Multivariable Cox-Regression (Disease specific survival)						TLS Distance (Fig. S2C)
Variable A	Variable B	Hazard Ratio	p-Value	Lower 95%	Upper 95%
<129.5 micrometer	TLS absent	0.195064	<.0001	0.088804	0.392586
<129.5 micrometer	>=129.5 micrometer	0.439	0.0299	0.195659	0.924098
>=129.5 micrometer	TLS absent	0.444337	0.0055	0.242749	0.790083
pN0	pNX	0.362459	0.0078	0.185205	0.753512
pN0	pN+	0.425835	0.0051	0.239501	0.768801
pT2	pT4	0.296301	0.0004	0.147946	0.580514
pT3	pT4	0.449481	0.0062	0.258734	0.791963
Figure S2D- Tertiary Lymphoid Amount - Multivariable Cox-Regression (Disease specific survival)						TLS Amount (Fig. S2D)
Variable A	Variable B	Hazard Ratio	p-Value	Lower 95%	Upper 95%
TLS Amount (n)<4	Absent	0.299596	0.0028	0.116128	0.675669
TLS Amount (n)>=4	Absent	0.316449	<.0001	0.178829	0.549676
pT2	pT4	0.288752	0.0003	0.145285	0.561133
pT3	pT4	0.453982	0.0063	0.263039	0.795506
pN0	pNX	0.356923	0.0072	0.181707	0.74388
pN0	pN+	0.41551	0.0043	0.233689	0.753587

## Sheet: Overview_Variables
Variable	Data type	Modeling Type
Survival time	numeric	continuous
Censor-Codes (DSS; OS)	numeric	nominal
Final Immune Phenotype	character	nominal
Specification:	Inflamed High
	Inflamed Low
	Uninflamed
	Evasion Phenotype
sTILs Tertile Groups	character	nominal
Specification:	T1/Tertile Group 1
	T2/Tertile Group 2
	T3/Tertile Group 3
pN-Stage	character	nominal
Specification:	pN0	no lymph node metastases
	pNX	no lmyph nodes assessable in lymph dissectates
	pN+	lymph node metastases present
pT-Stage	character	nominal
Specification:	pT2	Invasion to muscularis propria
	pT3	extravesical extension
	pT4	infiltration of other organs
WHO Grading 1973	character	nominal
Specification:	G1
	G2
	G3
WHO Grading 2016	character	nominal
Specification:	Low grade
	High grade
Lymphovascular Invasion	character	nominal
Specification:	L0	No lymphovascular Invasion
	LX	Lymphovascular Invasion not assessable
	L1	Lymphovascular Invasion present
Perineurial Sheath Invasion	character	nominal
Specification:	Pn0	No perineural sheath invasion
	Pn1	Perineural sheath invasion present
Blood Vessel Invasion	character	nominal
Specification:	V0	No blood vessel invasion present
	V1	Blood vessel invasion present
CIS	numeric	nominal
Specification:	0	CIS absent
	1	CIS present
Adjuvant chemotherapy	numeric	nominal
Specification:	0	No adjuvant chemotherapy
	1	Adjuvant chemotherapy applied
Gender	character	nominal
Specification:	male
	female
Age	numeric	continuous
Resection margin	character	nominal
Specification:	R0	complete excision, no residual tumor
	R1	incomplete excision, residual tumor (microscopic)
MDACC	character	nominal
Specification:	Basal
	Luminal
	Luminal p53-like
TCGA mRNA Subtypes	character	nominal
Specification:	Luminal papillary
	Luminal
	Luminal Infiltrated
	Basal squamous
	Neuronal-like

## Sheet: Fig1_COX_Phenotypes
Ad Figure 1: Multivariable Cox Regression - Immune Phenotypes
Median potential follow-up time (months)
Group	Median Time	Lower 95%-CI	Upper 95%-CI	25% Failures	75% Failures
Evasion Phenotype	67.87	32	127.13	67.63	122.47
Inflamed high	76.53	26.53	86.83	26.47	89
Inflamed low	51.8	25.9	81.9	20.83	81.9
Uninflamed	79.93	60.4	124.9	63.77	124.9
Combined	77.53	63.77	81.4	32.4	95.63
Model Selection:
1) Step One: Univariable Cox-Regressions
Source	LogWorth	PValue	AICc	BIC
Final Immune Phenotype	5.643	0	604.576	613.108	Included Variables: p≤0.20
pN-Stage	4.302	5e-05	611.638	617.357
pT-Stage	3.506	0.00031	615.302	621.022
Lymphovascular Invasion	2.367	0.00429	621.233	624.108
WHO Grading 1973	1.34	0.04568	625.395	628.27
Perineurial Sheath Invasion	1.02	0.0956	626.611	629.486
Blood Vessel Invasion	0.99	0.10233	626.719	629.595
CIS	0.757	0.17507	627.549	630.424
Adjuvant chemotherapy	0.59	0.25707	628.104	630.979	Dropped variables: p>0.20
Gender	0.554	0.27926	628.218	631.093
Age	0.297	0.5045	628.943	631.818
Resection margin	0.11	0.77671	629.308	632.183
WHO Grading 2016	0	1	All tumors were high grade (no parameter estimation possible)
MDACC-Panel	1.009	0.09804	627.245	635.777
2) Step Two: Backward selection; Multivariable Cox-Regression of included variables with p≤0.20 derived by univariable Cox-Regression
Multivariable Cox-Regression: Events (n): 72; Censorings (n): 63; Total (n): 135
Source	LogWorth	PValue	AICc	BIC
Final Immune Phenotype	4.031	9e-05	598.498	633.258	Included Variables: p≤0.10
pT-Stage	2.81	0.00155
pN-Stage	2.235	0.00583
Adjuvant chemotherapy	0.676	0.21099			Dropped variables: p>0.10
Perineurial Sheath Invasion	0.311	0.48893
CIS	0.196	0.63682
Blood Vessel Invasion	0.154	0.70166
WHO Grading 1973	0.133	0.73635
Lymphovascular Invasion	0.104	0.78623
3) Step Three: Forward selection of significant variables from multivariable analysis (step 2 model) and non-significant variables from univariable analysis (step 1)
Multivariable Cox-Regression: Events (n): 72; Censorings (n): 63; Total (n): 135
Source	LogWorth	PValue	AICc	BIC
Final Immune Phenotype	4.947	1e-05	592.558	622.37	Included Variables: p≤0.10
pT-Stage	3.156	0.0007
pN-Stage	2.251	0.00561
Adjuvant chemotherapy	0.856	0.13931			Dropped variables: p>0.10
Gender	0.661	0.21836
Age	0.26	0.54939
Resection margin	0.102	0.79115
MDACC-Panel	0.011	0.97458
4) Step four: Fitting of the final multivariable Model
Multivariable Cox-Regression: Events (n): 72; Censorings (n): 63; Total (n): 135
					Effect Likelihood Ratio Tests				Effect Wald Tests
Source	LogWorth	PValue	AICc	BIC	Nparm	DF	L-R ChiSquare	Prob>ChiSq	Nparm	DF	Wald ChiSquare	Prob>ChiSq
Final Immune Phenotype	4.538	3e-05	586.918	606.373	3	3	23.6932	<.0001	3	3	18.2191	0.0004
pT-Stage	2.79	0.00162			2	2	12.8491	0.0016	2	2	14.2238	0.0008
pN-Stage	2.234	0.00584			2	2	10.2872	0.0058	2	2	11.995	0.0025
Model	-LogLikelihood	ChiSquare	DF	Prob>Chisq
Difference	27.6609	55.3219	7	<.0001
Full	286.018
Reduced	313.679
Parameter Estimates
Term	Estimate	Std Error	Lower 95%	Upper 95%
pT-Stage[pT2]	-0.353904	0.196366	-0.758755	0.0162056
pT-Stage[pT3]	-0.340967	0.166412	-0.670915	-0.015778
pN-Stage[pN+]	-0.170736	0.181956	-0.536168	0.182078
pN-Stage[pN0]	-0.530923	0.172542	-0.868563	-0.189165
Final Immune Phenotype[Evasion Phenotype]	0.533003	0.272147	-0.030399	1.04932
Final Immune Phenotype[Inflamed high]	-1.2016	0.362687	-2.01024	-0.55856
Final Immune Phenotype[Inflamed low]	-0.0243422	0.232637	-0.493112	0.428213
Mutlivariable Hazard Ratios
pT-Stage
Level1	/Level2	Hazard Ratio	Prob>Chisq	Lower 95%	Upper 95%
pT2	pT4	0.350367	0.0022	0.175278	0.685879
pT3	pT4	0.354929	0.0006	0.199406	0.636908
pT2	pT3	0.987146	0.9669	0.52255	1.79268
pT3	pT2	1.01302	0.9669	0.557824	1.91369
pT4	pT3	2.81747	0.0006	1.57009	5.0149
pT4	pT2	2.85415	0.0022	1.45798	5.70521
pN-Stage
Level1	/Level2	Hazard Ratio	Prob>Chisq	Lower 95%	Upper 95%
pN0	pNX	0.291539	0.0016	0.148591	0.607736
pN+	pNX	0.417949	0.0246	0.205565	0.889357
pN0	pN+	0.697545	0.1971	0.410524	1.21253
pN+	pN0	1.4336	0.1971	0.824723	2.43591
pNX	pN+	2.39263	0.0246	1.12441	4.86464
pNX	pN0	3.43008	0.0016	1.64545	6.7299
Final Immune Phenotype
Level1	/Level2	Hazard Ratio	Prob>Chisq	Lower 95%	Upper 95%
Inflamed high	Uninflamed	0.150387	<.0001	0.050773	0.359253
Inflamed high	Evasion Phenotype	0.17647	0.0012	0.0536889	0.506867
Inflamed high	Inflamed low	0.308122	0.0143	0.0995198	0.799382
Inflamed low	Uninflamed	0.488076	0.0117	0.266782	0.855832
Inflamed low	Evasion Phenotype	0.572728	0.1684	0.266761	1.27913
Evasion Phenotype	Uninflamed	0.852195	0.6446	0.408909	1.64202
Uninflamed	Evasion Phenotype	1.17344	0.6446	0.609005	2.44553
Evasion Phenotype	Inflamed low	1.74603	0.1684	0.781783	3.74868
Uninflamed	Inflamed low	2.04886	0.0117	1.16845	3.74838
Inflamed low	Inflamed high	3.24547	0.0143	1.25097	10.0483
Evasion Phenotype	Inflamed high	5.66669	0.0012	1.9729	18.6258
Uninflamed	Inflamed high	6.64952	<.0001	2.78355	19.6955

## Sheet: Fig2_COX_CCC_EMN_TERTILE
Ad Figure 2: Multivariable Cox Regression - sTILs Tertiles
Median potential follow-up time (months)
Group	Median Time	Lower 95%-CI	Upper 95%-CI	25% Failures	75% Failures
T1	86.07	45.73	124.9	60.4	121.93
T2	77.97	65.97	81.9	32.27	81.9
T3	69.67	32.4	82.67	25.9	89
Combined	77.53	63.77	81.4	32.4	95.63
Model Selection:
1) Step One: Univariable Cox-Regressions
Source	LogWorth	PValue	AICc	BIC
sTILS Tertiles	5.231	1e-05	607.36	613.08	Included Variables: p≤0.20
pN-Stage	4.302	5e-05	611.638	617.357
pT-Stage	3.506	0.00031	615.302	621.022
Lymphovascular Invasion	2.367	0.00429	621.233	624.108
WHO Grading 1973	1.34	0.04568	625.395	628.27
Perineurial Sheath Invasion	1.02	0.0956	626.611	629.486
Blood Vessel Invasion	0.99	0.10233	626.719	629.595
CIS	0.757	0.17507	627.549	630.424
Adjuvant chemotherapy	0.59	0.25707	628.104	630.979	Dropped variables: p>0.20
Gender	0.554	0.27926	628.218	631.093
Age	0.297	0.5045	628.943	631.818
Resection margin	0.11	0.77671	629.308	632.183
WHO Grading 2016	0	1	All tumors were high grade (no parameter estimation possible)
MDACC-Panel	1.009	0.09804	627.245	635.777
2) Step Two: Backward selection; Multivariable Cox-Regression of included variables with p≤0.20 derived by univariable Cox-Regression
Multivariable Cox-Regression: Events (n): 72; Censorings (n): 63; Total (n): 135
Source	LogWorth	PValue	AICc	BIC
sTILS Tertiles	4.16	7e-05	596.829	626.64	Included Variables: p≤0.10
pN-Stage	2.656	0.00221
pT-Stage	2.391	0.00406
CIS	0.388	0.40904			Dropped variables: p>0.10
Lymphovascular Invasion	0.251	0.56143
Perineurial Sheath Invasion	0.118	0.76287
WHO Grading 1973	0.062	0.86759
Blood Vessel Invasion	0.01	0.97765
3) Step Three: Forward selection of significant variables from multivariable analysis (step 2 model) and non-significant variables from univariable analysis (step 1)
Multivariable Cox-Regression: Events (n): 72; Censorings (n): 63; Total (n): 135
Source	LogWorth	PValue	AICc	BIC
sTILS Tertiles	4.886	1e-05	593.331	620.61	Included Variables: p≤0.10
pN-Stage	2.672	0.00213
pT-Stage	2.418	0.00382
Gender	0.612	0.24416			Dropped variables: p>0.10
Adjuvant chemotherapy	0.491	0.32278
Resection margin	0.196	0.63688
Age	0.023	0.94751
MDACC-Panel	0.19	0.64583
4) Step four: Fitting of the final multivariable Model
Multivariable Cox-Regression: Events (n): 72; Censorings (n): 63; Total (n): 135
					Effect Likelihood Ratio Tests				Effect Wald Tests
Source	LogWorth	PValue	AICc	BIC	Nparm	DF	L-R ChiSquare	Prob>ChiSq	Nparm	DF	Wald ChiSquare	Prob>ChiSq
sTILS Tertiles	4.754	2e-05	586.495	603.27	2	2	21.8908	<.0001	2	2	17.406	0.0002
pN-Stage	2.97	0.00107			2	2	13.6772	0.0011	2	2	15.9427	0.0003
pT-Stage	2.5	0.00316			2	2	11.5152	0.0032	2	2	12.5639	0.0019
Model	-LogLikelihood	ChiSquare	DF	Prob>Chisq
Difference	26.7597	53.5195	6	<.0001
Full	286.919
Reduced	313.679
Parameter Estimates
Term	Estimate	Std Error	Lower 95%	Upper 95%
pT-Stage[pT2]	-0.453587	0.196894	-0.859419	-0.082472
pT-Stage[pT3]	-0.206684	0.161087	-0.525498	0.108833
pN-Stage[pN+]	-0.120262	0.180911	-0.483774	0.230444
pN-Stage[pN0]	-0.634845	0.172068	-0.971899	-0.294267
STILS Tertiles (0-5;5-15;>15%)[T1]	0.671488	0.174691	0.331006	1.02114
STILS Tertiles (0-5;5-15;>15%)[T2]	0.24257	0.176536	-0.102392	0.59505
Mutlivariable Hazard Ratios
pT-Stage
Level1	/Level2	Hazard Ratio	Prob>Chisq	Lower 95%	Upper 95%
pT3	pT2	1.28005	0.4166	0.711319	2.39875
pT4	pT2	3.04608	0.0013	1.54951	6.11481
pT4	pT3	2.37965	0.0034	1.34192	4.16162
pT2	pT3	0.781217	0.4166	0.416884	1.40584
pT2	pT4	0.32829	0.0013	0.163537	0.645365
pT3	pT4	0.420229	0.0034	0.240291	0.745202
pN-Stage
Level1	/Level2	Hazard Ratio	Prob>Chisq	Lower 95%	Upper 95%
pN0	pN+	0.59775	0.0687	0.350771	1.0414
pNX	pN+	2.39976	0.0224	1.13948	4.82245
pNX	pN0	4.01465	0.0004	1.94365	7.79735
pN+	pN0	1.67294	0.0687	0.960246	2.85086
pN+	pNX	0.416708	0.0224	0.207364	0.877594
pN0	pNX	0.249087	0.0004	0.128249	0.514497
Final Immune Phenotype
Level1	/Level2	Hazard Ratio	Prob>Chisq	Lower 95%	Upper 95%
T2	T1	0.651213	0.0946	0.392771	1.07726
T3	T1	0.204836	<.0001	0.0913621	0.414809
T3	T2	0.314545	0.0011	0.139738	0.640858
T1	T2	1.53559	0.0946	0.928282	2.54601
T1	T3	4.88196	<.0001	2.41075	10.9455
T2	T3	3.1792	0.0011	1.56041	7.15625

## Sheet: Fig3_TILs_OS_TCGA_Whole
Ad Figure 3: Multivariable Cox Regression -Tertile Split: Overall survival (OS)
Median potential follow-up time (months)
Group	Median Time	Lower 95%-CI	Upper 95%-CI	25% Failures	75% Failures
T1	45.04	32.78	60.16	19	76.6
T2	25.02	18.81	35.24	15.02	58.92
T3	27.98	21.86	36.43	17.75	61.94
Combined	29.36	26.24	36.43	16.14	64.01
Model Selection:
1) Step One: Univariable Cox-Regressions
Source	LogWorth	PValue	AICc	BIC
pN-Stage	5.81	0	1854.82	1862.8	Included Variables: p≤0.20
Age	4.703	2e-05	1861.35	1865.35
Lymphovascular Invasion	4.244	6e-05	1862.03	1870.01
TILs Tertiles	4.107	8e-05	1862.66	1870.65
pT-Stage	3.92	0.00012	1862.88	1874.84
TCGA mRNA Subtype	3.369	0.00043	1865.3	1881.23
cM-Stage	2.551	0.00281	1869.83	1877.81
Adjuvant Chemotherapy	1.738	0.01829	1873.99	1877.98
Grading WHO 2016	1.11	0.07771	1876.44	1880.44
Gender	0.294	0.50851	1879.12	1883.11	Dropped variables: p>0.20
2) Step Two: Backward selection; Multivariable Cox-Regression of included variables with p≤0.20 derived by univariable Cox-Regression
Multivariable Cox-Regression: Events (n): 176; Censorings (n): 230; Total (n): 406
Source	LogWorth	PValue	AICc	BIC
Adjuvant Chemotherapy	4.85	1e-05	1802.83	1873.17	Included Variables: p≤0.10
TILs Tertiles	3.252	0.00056
TCGA mRNA Subtype	2.95	0.00112
Age	2.664	0.00217
pT-Stage	2.027	0.00939
Lymphovascular Invasion	1.534	0.02921
pN-Stage	1.355	0.04416
cM-Stage	0.871	0.13453			Dropped variables: p>0.10
Grading WHO 2016	0.024	0.94652
3) Step Three: Forward selection of significant variables from multivariable analysis (step 2 model) and non-significant variables from univariable analysis (step 1)
Multivariable Cox-Regression: Events (n): 176; Censorings (n): 230; Total (n): 406
Source	LogWorth	PValue	AICc	BIC
Adjuvant Chemotherapy	4.409	4e-05	1802.02	1864.72	Included Variables: p≤0.10
TILs Tertiles	3.657	0.00022
TCGA mRNA Subtype	3.442	0.00036
Age	2.46	0.00347
pT-Stage	2.147	0.00713
pN-Stage	1.862	0.01373
Lymphovascular Invasion	1.418	0.03816
Gender	0.304	0.49677			Dropped variables: p>0.10
4) Step four: Fitting of the final multivariable Model
Multivariable Cox-Regression: Events (n): 176; Censorings (n): 230; Total (n): 406
					Effect Likelihood Ratio Tests				Effect Wald Tests
Source	LogWorth	PValue	AICc	BIC	Nparm	DF	L-R ChiSquare	Prob>ChiSq	Nparm	DF	Wald ChiSquare	Prob>ChiSq
Adjuvant Chemotherapy	4.469	3e-05	1800.31	1859.18	1	1	17.1819	<.0001	1	1	15.2376	<.0001
TILs Tertiles	3.691	0.0002			2	2	16.9991	0.0002	2	2	16.983	0.0002
TCGA mRNA Subtype	3.489	0.00032			4	4	20.9497	0.0003	4	4	20.8847	0.0003
Age	2.493	0.00321			1	1	8.68389	0.0032	1	1	8.36437	0.0038
pT-Stage	2.08	0.00832			3	3	11.7431	0.0083	3	3	11.619	0.0088
pN-Stage	1.81	0.01548			2	2	8.33604	0.0155	2	2	8.2775	0.0159
Lymphovascular Invasion	1.452	0.0353			2	2	6.68786	0.0353	2	2	6.39296	0.0409
Model	-LogLikelihood	ChiSquare	DF	Prob>Chisq
Difference	54.2312	108.462	15	<.0001
Full	884.541
Reduced	938.773
Parameter Estimates
Term	Estimate	Std Error	Lower 95%	Upper 95%
pT-Stage[pT2]	-0.481958	0.161337	-0.804952	-0.170104
pT-Stage[pT3]	-0.0131353	0.129971	-0.265331	0.245392
pT-Stage[pT4]	0.423739	0.179165	0.0664315	0.770857
Age	0.0240035	0.0082996	0.0079451	0.0405095
Adjuvant Chemotherapy[Adjuvant Chemotherapy]	-0.430888	0.110384	-0.655086	-0.221107
Lymphovascular Invasion[L0]	-0.32441	0.129597	-0.584374	-0.075184
Lymphovascular Invasion[L1]	0.128799	0.126262	-0.119506	0.375803
pN-Stage[pN+]	0.196413	0.138627	-0.073263	0.471087
pN-Stage[pN0]	-0.323435	0.125834	-0.568379	-0.073905
TCGA mRNA Subtype[Basal Squamous]	0.298463	0.144006	0.0154578	0.581085
TCGA mRNA Subtype[Luminal]	-0.176731	0.234064	-0.664792	0.258822
TCGA mRNA Subtype[Luminal Infiltrated]	-0.141402	0.159897	-0.461681	0.166954
TCGA mRNA Subtype[Luminal Papillary]	-0.556712	0.162064	-0.881926	-0.244647
TILs Tertiles[T2-T1]	-0.569324	0.192754	-0.951782	-0.194649
TILs Tertiles[T3-T2]	-0.2678	0.208109	-0.678186	0.139836
Mutlivariable Hazard Ratios
pT-Stage
Level1	/Level2	Hazard Ratio	Prob>Chisq	Lower 95%	Upper 95%
pT2	pT4	0.40426	0.001	0.237466	0.690028
pT2	pTX	0.575042	0.1286	0.294538	1.18331
pT2	pT3	0.625738	0.0208	0.411176	0.932545
pT3	pT4	0.646052	0.0483	0.428138	0.996689
pTX	pT4	0.703009	0.3489	0.32364	1.45568
pT3	pTX	0.918981	0.8044	0.487079	1.85466
pTX	pT3	1.08816	0.8044	0.539183	2.05306
pT4	pTX	1.42246	0.3489	0.686966	3.08986
pT4	pT3	1.54786	0.0483	1.00332	2.3357
pT3	pT2	1.59811	0.0208	1.07233	2.43205
pTX	pT2	1.739	0.1286	0.845089	3.39515
pT4	pT2	2.47366	0.001	1.44922	4.21112
Adjuvant Chemotherapy
Level1	/Level2	Hazard Ratio	Prob>Chisq	Lower 95%	Upper 95%
No Adjuvant Chemotherapy	Adjuvant Chemotherapy	2.36736	<.0001	1.55615	3.70681
Adjuvant Chemotherapy	No Adjuvant Chemotherapy	0.422411	<.0001	0.269774	0.642612
Lymphvascular Invasion
Level1	/Level2	Hazard Ratio	Prob>Chisq	Lower 95%	Upper 95%
L1	L0	1.57335	0.0411	1.01843	2.45121
LX	L0	1.68206	0.0177	1.0942	2.6012
LX	L1	1.06909	0.7557	0.699448	1.62318
L0	L1	0.635585	0.0411	0.407962	0.981899
L0	LX	0.594508	0.0177	0.384438	0.913912
L1	LX	0.935371	0.7557	0.616076	1.4297
pN-Stage
Level1	/Level2	Hazard Ratio	Prob>Chisq	Lower 95%	Upper 95%
pN0	pN+	0.594611	0.0068	0.408138	0.865985
pNX	pN+	0.932962	0.8156	0.508189	1.64592
pNX	pN0	1.56903	0.1211	0.883081	2.6716
pN+	pN0	1.68177	0.0068	1.15475	2.45015
pN+	pNX	1.07186	0.8156	0.607565	1.96777
pN0	pNX	0.637337	0.1211	0.374307	1.1324
TCGA mRNA Subtype
Level1	/Level2	Hazard Ratio	Prob>Chisq	Lower 95%	Upper 95%
Luminal	Basal Squamous	0.621765	0.1092	0.340458	1.1355
Luminal Infiltrated	Basal Squamous	0.644123	0.037	0.423481	0.979724
Luminal Infiltrated	Luminal	1.03596	0.9115	0.555056	1.93352
Luminal Papillary	Basal Squamous	0.425209	<.0001	0.275595	0.656044
Luminal Papillary	Luminal	0.683874	0.2473	0.364841	1.28188
Luminal Papillary	Luminal Infiltrated	0.660136	0.0863	0.410812	1.06077
Neuronal	Basal Squamous	1.32038	0.3892	0.711662	2.44975
Neuronal	Luminal	2.1236	0.0627	0.968911	4.65436
Neuronal	Luminal Infiltrated	2.04988	0.0372	1.07955	3.89237
Neuronal	Luminal Papillary	3.10525	0.0014	1.64067	5.8772
Basal Squamous	Luminal	1.60833	0.1092	0.880668	2.93722
Basal Squamous	Luminal Infiltrated	1.5525	0.037	1.0207	2.36138
Luminal	Luminal Infiltrated	0.965288	0.9115	0.517191	1.80162
Basal Squamous	Luminal Papillary	2.35179	<.0001	1.52429	3.62851
Luminal	Luminal Papillary	1.46226	0.2473	0.780102	2.74092
Luminal Infiltrated	Luminal Papillary	1.51484	0.0863	0.942707	2.4342
Basal Squamous	Neuronal	0.757359	0.3892	0.408204	1.40516
Luminal	Neuronal	0.470899	0.0627	0.214852	1.03209
Luminal Infiltrated	Neuronal	0.487833	0.0372	0.256913	0.926308
Luminal Papillary	Neuronal	0.322036	0.0014	0.170149	0.609507
sTILs Tertiles
Level1	/Level2	Hazard Ratio	Prob>Chisq	Lower 95%	Upper 95%
T2	T1	0.565908	0.0028	0.386053	0.823123
T3	T1	0.432954	<.0001	0.283653	0.654111
T3	T2	0.765061	0.1977	0.507537	1.15009
T1	T2	1.76707	0.0028	1.21488	2.59032
T1	T3	2.30972	<.0001	1.52879	3.52543
T2	T3	1.30709	0.1977	0.869501	1.9703
Age
Unit Risk Ratios
Per unit change in regressor
Term	Risk Ratio	Lower 95%	Upper 95%	Reciprocal
Age	1.02429	1.00798	1.04134	0.976282
Range Risk Ratios
Per change in regressor over entire range
Term	Risk Ratio	Lower 95%	Upper 95%	Reciprocal
Age	3.8351	1.56038	9.66518	0.26075

## Sheet: Fig5_TILs Tertiles Basal tumors
Ad Figure 5: Multivariable Cox Regression - sTILs Tertiles
Median potential follow-up time (months)
Group	Median Time	Lower 95%-CI	Upper 95%-CI	25% Failures	75% Failures
T1	50.7	24.92	69.34	24.92	69.34
T2	43.59	25.74	60.66	16.14	86.3
T3	34.45	21.04	54.21	19.33	61.94
Combined	43.59	29.16	56.15	19.33	66.64
Model Selection:
1) Step One: Univariable Cox-Regressions
Source	LogWorth	PValue	AICc	BIC
TILs Tertiles Basal	4.876	1e-05	586.414	592.224	Included Variables: p≤0.20
Adjuvant Chemotherapy	3.167	0.00068	595.27	598.19
Age	2.517	0.00304	598.031	600.951
pN-Stage	0.806	0.15632	605.159	610.969
pT-Stage	0.427	0.37407	607.843	616.514	Dropped variables: p>0.20
Gender	0.198	0.63322	606.585	609.505
cM-Stage	0.154	0.70103	608.16	613.971
Grading WHO 2016	0.14	0.72409	606.688	609.608
Lymphovascular Invasion	0.038	0.91565	608.694	614.505
2) Step Two: Backward selection; Multivariable Cox-Regression of included variables with p≤0.20 derived by univariable Cox-Regression
Multivariable Cox-Regression: Events (n): 69; Censorings (n): 72; Total (n): 141
Source	LogWorth	PValue	AICc	BIC
TILs Tertiles Basal	3.915	0.00012	577.649	594.715	Included Variables: p≤0.10
Age	1.857	0.0139
Adjuvant Chemotherapy	1.649	0.02246
pN-Stage	0.147	0.71282			Dropped variables: p>0.10
3) Step Three: Forward selection of significant variables from multivariable analysis (step 2 model) and non-significant variables from univariable analysis (step 1)
Multivariable Cox-Regression: Events (n): 69; Censorings (n): 72; Total (n): 141
Source	LogWorth	PValue	AICc	BIC
TILs Tertiles Basal	3.885	0.00013	592.504	632.895	Included Variables: p≤0.10
Age	1.826	0.01491
Adjuvant Chemotherapy	1.191	0.06446
pT-Stage	0.799	0.15884			Dropped variables: p>0.10
Lymphovascular Invasion	0.502	0.31476
Gender	0.274	0.53167
pN-Stage	0.261	0.54851
Grading WHO 2016	0.145	0.71654
cM-Stage	0.053	0.88553
4) Step four: Fitting of the final multivariable Model
Multivariable Cox-Regression: Events (n): 69; Censorings (n): 72; Total (n): 141
					Effect Likelihood Ratio Tests				Effect Wald Tests
Source	LogWorth	PValue	AICc	BIC	Nparm	DF	L-R ChiSquare	Prob>ChiSq	Nparm	DF	Wald ChiSquare	Prob>ChiSq
TILs Tertiles Basal	4.993	1e-05	573.993	585.494	2	2	22.9943	<.0001	2	2	24.0938	<.0001
Age	1.922	0.01197			1	1	6.31458	0.012	1	1	5.82737	0.0158
Adjuvant Chemotherapy	1.572	0.02681			1	1	4.90321	0.0268	1	1	4.22647	0.0398
Model	-LogLikelihood	ChiSquare	DF	Prob>Chisq
Difference	19.5421	39.0842	4	<.0001
Full	282.85
Reduced	302.392
Parameter Estimates
Term	Estimate	Std Error	Lower 95%	Upper 95%
Adjuvant Chemotherapy[Adjuvant Chemotherapy]	-0.412766	0.200777	-0.841677	-0.044692
Age	0.0337759	0.0139917	0.0072108	0.0621574
TILs Tertiles Basal[T1]	0.806648	0.168082	0.475099	1.13673
TILs Tertiles Basal[T2]	-0.280376	0.192393	-0.673617	0.084883
Mutlivariable Hazard Ratios
Adjuvant Chemotherapy
Level1	/Level2	Hazard Ratio	Prob>Chisq	Lower 95%	Upper 95%
No Adjuvant Chemotherapy	Adjuvant Chemotherapy	2.2831	0.0268	1.0935	5.38359
Adjuvant Chemotherapy	No Adjuvant Chemotherapy	0.438002	0.0268	0.18575	0.914494
sTILs Tertiles
Level1	/Level2	Hazard Ratio	Prob>Chisq	Lower 95%	Upper 95%
T2	T1	0.337218	0.0003	0.179634	0.613259
T3	T1	0.263706	<.0001	0.14559	0.464718
T3	T2	0.782004	0.4651	0.403467	1.52132
T1	T2	2.96544	0.0003	1.63063	5.56688
T1	T3	3.7921	<.0001	2.15184	6.86859
T2	T3	1.27877	0.4651	0.657324	2.47851
Age
Unit Risk Ratios
Per unit change in regressor
Term	Risk Ratio	Lower 95%	Upper 95%	Reciprocal
Age	1.03435	1.00724	1.06413	0.966788
Range Risk Ratios
Per change in regressor over entire range
Term	Risk Ratio	Lower 95%	Upper 95%	Reciprocal
Age	4.89134	1.40341	18.5672	0.204443

## Sheet: Fig6_TILs Tertiles_TCGA_Luminal
Ad Figure 6: Multivariable Cox Regression -Tertile Split
Median potential follow-up time (months)
Group	Median Time	Lower 95%-CI	Upper 95%-CI	25% Failures	75% Failures
T1	46.98	26.7	91.73	21.11	94.29
T2	35.84	18.81	50.04	14.07	58.72
T3	21.3	18.81	26.73	15.02	36.66
Combined	26.27	21.3	32.78	15.02	62.86
Model Selection:
1) Step One: Univariable Cox-Regressions
Source	LogWorth	PValue	AICc	BIC
Lymphovascular Invasion	6.962	0	849.466	856.419	Included Variables: p≤0.20
pN-Stage	6.642	0	850.938	857.891
pT-Stage	4.085	8e-05	862.06	872.465
TILs Tertile Luminal	3.153	0.0007	867.008	873.961
Age	2.438	0.00364	871.04	874.525
TCGA mRNA Subtype	2.307	0.00493	870.902	877.855
cM-Stage	2.183	0.00656	871.473	878.426
Grading WHO 2016	1.108	0.07792	876.385	879.87
Gender	0.319	0.47988	878.994	882.479	Dropped variables: p>0.20
Adjuvant Chemotherapy	0.017	0.96243	879.491	882.976
2) Step Two: Backward selection; Multivariable Cox-Regression of included variables with p≤0.20 derived by univariable Cox-Regression
Multivariable Cox-Regression: Events (n): 93; Censorings (n): 152; Total (n): 245
Source	LogWorth	PValue	AICc	BIC
Lymphovascular Invasion	2.791	0.00162	835.052	885.475	Included Variables: p≤0.10
pT-Stage	1.968	0.01077
Age	1.755	0.01756
TILs Tertile Luminal	1.376	0.04211
TCGA mRNA Subtype	0.758	0.17471			Dropped variables: p>0.10
cM-Stage	0.494	0.32027
pN-Stage	0.345	0.45225
Grading WHO 2016	0.076	0.83889
3) Step Three: Forward selection of significant variables from multivariable analysis (step 2 model) and non-significant variables from univariable analysis (step 1)
Multivariable Cox-Regression: Events (n): 93; Censorings (n): 152; Total (n): 245
Source	LogWorth	PValue	AICc	BIC
Lymphovascular Invasion	5.473	0	832.299	866.371	Included Variables: p≤0.10
pT-Stage	2.954	0.00111
Age	1.832	0.01474
TILs Tertile Luminal	1.484	0.03283
Adjuvant Chemotherapy	0.858	0.13863			Dropped variables: p>0.10
Gender	0.248	0.56526
4) Step four: Fitting of the final multivariable Model
Multivariable Cox-Regression: Events (n): 93; Censorings (n): 152; Total (n): 245
					Effect Likelihood Ratio Tests				Effect Wald Tests
Source	LogWorth	PValue	AICc	BIC	Nparm	DF	L-R ChiSquare	Prob>ChiSq	Nparm	DF	Wald ChiSquare	Prob>ChiSq
Lymphovascular Invasion	4.16	7e-05	830.751	858.151	1	1	5.56261	0.0183	1	1	7.10459	0.0077
pT-Stage	2.554	0.00279			3	3	11.825	0.008	3	3	14.0864	0.0028
Age	2.114	0.00769			2	2	22.3429	<.0001	2	2	19.1555	<.0001
TILs Tertile Luminal	1.565	0.02723			2	2	5.37608	0.068	2	2	7.20664	0.0272
Model	-LogLikelihood	ChiSquare	DF	Prob>Chisq
Difference	31.6682	63.3363	8	<.0001
Full	407.07
Reduced	438.738
Parameter Estimates
Term	Estimate	Std Error	Lower 95%	Upper 95%
Age	0.0326716	0.0122575	0.0090889	0.0571945
pT-Stage[pT2]	-0.701605	0.220303	-1.15214	-0.282172
pT-Stage[pT3]	-0.190951	0.174147	-0.531113	0.154356
pT-Stage[pT4]	0.512777	0.221764	0.0647215	0.939361
Lymphovascular Invasion[L0]	-0.842064	0.200134	-1.26091	-0.470595
Lymphovascular Invasion[L1]	0.51637	0.155154	0.214903	0.825221
TILs Tertile Luminal[T1]	0.357042	0.146341	0.0650712	0.640694
TILs Tertile Luminal[T2]	0.0121129	0.149802	-0.287818	0.301545
Mutlivariable Hazard Ratios
pT-Stage
Level1	/Level2	Hazard Ratio	Prob>Chisq	Lower 95%	Upper 95%
pT3	pT2	1.66638	0.0743	0.952479	3.04464
pT4	pT2	3.36821	0.0008	1.6712	6.84292
pT4	pT3	2.02127	0.0169	1.14122	3.45032
pTX	pT2	2.94876	0.0235	1.16931	6.88207
pTX	pT3	1.76956	0.193	0.731539	3.84792
pTX	pT4	0.875467	0.77	0.339555	2.0866
pT2	pT3	0.600103	0.0743	0.328446	1.04989
pT2	pT4	0.296893	0.0008	0.146136	0.598373
pT3	pT4	0.494738	0.0169	0.289828	0.876258
pT2	pTX	0.339126	0.0235	0.145305	0.855207
pT3	pTX	0.565113	0.193	0.259881	1.36698
pT4	pTX	1.14225	0.77	0.479248	2.94503
Lymphovascular Invasion
Level1	/Level2	Hazard Ratio	Prob>Chisq	Lower 95%	Upper 95%
L1	L0	3.89009	<.0001	2.16163	7.45921
LX	L0	3.21478	0.0004	1.67887	6.43518
LX	L1	0.8264	0.4615	0.491315	1.36816
L0	L1	0.257063	<.0001	0.134063	0.462613
L0	LX	0.311064	0.0004	0.155396	0.595639
L1	LX	1.21007	0.4615	0.73091	2.03535
sTILs Tertiles
Level1	/Level2	Hazard Ratio	Prob>Chisq	Lower 95%	Upper 95%
T2	T1	0.70827	0.1623	0.435036	1.14963
T3	T1	0.483745	0.007	0.280919	0.820126
T3	T2	0.682995	0.167	0.392772	1.1723
T1	T2	1.41189	0.1623	0.869842	2.29866
T1	T3	2.06721	0.007	1.21933	3.55975
T2	T3	1.46414	0.167	0.853027	2.54601
Age
Unit Risk Ratios
Per unit change in regressor
Term	Risk Ratio	Lower 95%	Upper 95%	Reciprocal
Age	1.03321	1.00913	1.05886	0.967856
Range Risk Ratios
Per change in regressor over entire range
Term	Risk Ratio	Lower 95%	Upper 95%	Reciprocal
Age	6.23146	1.66359	24.6036	0.160476

## Sheet: Fig_7_Chemotherapy_TILs_tert
Ad Figure 7: Multivariable Cox Regression -Tertile Split
Median potential follow-up time (months)
Group	Median Time	Lower 95%-CI	Upper 95%-CI	25% Failures	75% Failures
T1	63.77	32.75	91.66	35.94	91.66
T2	60.12	38.8	79.93	25.39	77.97
T3	54.17	36.4	59.33	27.33	81.9
Combined	56.31	38.57	62.81	29.76	79.93
Model Selection:
1) Step One: Univariable Cox-Regressions
Source	LogWorth	PValue	AICc	BIC
TILs Tertiles	4.524	3e-05	420.806	425.934	Included Variables: p≤0.20
pN-Stage	1.899	0.01262	432.896	438.024
L	1.161	0.06903	436.294	441.423
Age	0.82	0.15136	437.501	440.086
Intrinsic mRNA Subtype	0.89	0.12886	437.542	442.671
pT_Stage	0.715	0.19271	439.034	446.664
cM-Stage	0.306	0.49409	440.23	445.359	Dropped variables: p>0.20
Gender	0.254	0.55693	439.214	441.799
WHO Grading 2016	0	1	All tumors were high grade (no parameter estimation possible)
2) Step Two: Backward selection; Multivariable Cox-Regression of included variables with p≤0.20 derived by univariable Cox-Regression
Multivariable Cox-Regression: Events (n): 53; Censorings (n): 49; Total (n): 102
Source	LogWorth	PValue	AICc	BIC
TILs Tertiles	3.342	0.00046	429.068	457.062	Included Variables: p≤0.10
Age	1.47	0.03389
pN-Stage	0.684	0.20107			Dropped variables: p>0.10
Intrinsic mRNA Subtype	0.583	0.26143
pT_Stage	0.474	0.3354
L	0.188	0.64792
3) Step Three: Forward selection of significant variables from multivariable analysis (step 2 model) and non-significant variables from univariable analysis (step 1)
Multivariable Cox-Regression: Events (n): 53; Censorings (n): 49; Total (n): 102
Source	LogWorth	PValue	AICc	BIC
TILs Tertiles	3.936	0.00012	424.592	444.044	Included Variables: p≤0.10
pN-Stage	1.286	0.05175
Age	1.105	0.07849
Gender	0.149	0.70967			Dropped variables: p>0.10
cM-Stage	0.011	0.97538
4) Step four: Fitting of the final multivariable Model
Multivariable Cox-Regression: Events (n): 53; Censorings (n): 49; Total (n): 102
					Effect Likelihood Ratio Tests				Effect Wald Tests
Source	LogWorth	PValue	AICc	BIC	Nparm	DF	L-R ChiSquare	Prob>ChiSq	Nparm	DF	Wald ChiSquare	Prob>ChiSq
TILs Tertiles	3.976	0.00011	417.865	430.365	2	2	18.308	0.0001	2	2	5.47433	0.0648
pN-Stage	1.298	0.05036			2	2	5.97698	0.0504	1	1	2.87286	0.0901
Age	1.061	0.08697			1	1	2.92955	0.087	2	2	15.9743	0.0003
Model	-LogLikelihood	ChiSquare	DF	Prob>Chisq
Difference	15.1394	30.2787	5	<.0001
Full	203.62
Reduced	218.76
Parameter Estimates
Term	Estimate	Std Error	Lower 95%	Upper 95%
TILs Tertiles[T1]	0.616771	0.204123	0.203163	1.00948
TILs Tertiles[T2]	0.272102	0.188378	-0.101586	0.641299
Age	0.0253055	0.0149299	-0.00364	0.055025
pN-Stage[pN+]	0.162922	0.205364	-0.227814	0.584889
pN-Stage[pN0]	-0.549126	0.241636	-1.03641	-0.076358
Mutlivariable Hazard Ratios
pN-Stage
Level1	/Level2	Hazard Ratio	Prob>Chisq	Lower 95%	Upper 95%
pN0	pN+	0.490638	0.0259	0.246503	0.920221
pNX	pN+	1.25017	0.631	0.464341	2.84134
pNX	pN0	2.54805	0.0819	0.878998	6.604
pN+	pN0	2.03816	0.0259	1.0867	4.05675
pN+	pNX	0.799889	0.631	0.351947	2.15359
pN0	pNX	0.392456	0.0819	0.151423	1.13766
sTILs Tertiles
Level1	/Level2	Hazard Ratio	Prob>Chisq	Lower 95%	Upper 95%
T2	T1	0.708455	0.2884	0.379688	1.34985
T3	T1	0.221875	0.0001	0.101358	0.470698
T3	T2	0.313181	0.0009	0.148809	0.625803
T1	T2	1.41152	0.2884	0.740825	2.63374
T1	T3	4.50705	0.0001	2.1245	9.86603
T2	T3	3.19304	0.0009	1.59795	6.72001
Age
Unit Risk Ratios
Per unit change in regressor
Term	Risk Ratio	Lower 95%	Upper 95%	Reciprocal
Age	1.02563	0.996367	1.05657	0.975012
Range Risk Ratios
Per change in regressor over entire range
Term	Risk Ratio	Lower 95%	Upper 95%	Reciprocal
Age	2.82223	0.861375	9.54508	0.35433

## Sheet: Fig_S2C_TLS_Distance
Ad Figure S2C: Multivariable Cox Regression - Tertiary lymphoid structure "Distance"
Median potential follow-up time (months)
Group	Median Time	Lower 95%-CI	Upper 95%-CI	25% Failures	75% Failures
<129.5 micrometer	67.87	32.4	79.7	25.9	81.9
>=129.5 micrometer	78.27	32.27	96.6	32	124.9
TLS absent	86.83	63.77	122.47	67.63	122.47
Combined	77.53	63.77	81.4	32.4	95.63
Model Selection:
1) Step One: Univariable Cox-Regressions
Source	LogWorth	PValue	AICc	BIC
TLS Distance	5.36	0	606.763	612.483	Included Variables: p≤0.20
pN-Stage	4.302	5e-05	611.638	617.357
pT-Stage	3.506	0.00031	615.302	621.022
Lymphovascular Invasion	2.367	0.00429	621.233	624.108
WHO Grading 1973	1.34	0.04568	625.395	628.27
Perineural Sheath Invasion	1.02	0.0956	626.611	629.486
MDACC-Panel	1.009	0.09804	627.245	635.777
Blood Vessel Invasion	0.99	0.10233	626.719	629.595
CIS	0.757	0.17507	627.549	630.424
Adjuvant chemotherapy	0.59	0.25707	628.104	630.979	Dropped variables: p>0.20
Gender	0.554	0.27926	628.218	631.093
Age	0.297	0.5045	628.943	631.818
Resection margin	0.11	0.77671	629.308	632.183
WHO Grading 2016	0	1	All tumors were high grade (no parameter estimation possible)
2) Step Two: Backward selection; Multivariable Cox-Regression of included variables with p≤0.20 derived by univariable Cox-Regression
Multivariable Cox-Regression: Events (n): 72; Censorings (n): 63; Total (n): 135
Source	LogWorth	PValue	AICc	BIC
pN-Stage	2.304	0.00496	598.33	637.876	Included Variables: p≤0.10
pT-Stage	2.078	0.00836
TLS Distance	1.57	0.02693
Perineural Sheath Invasion	1.016	0.09638
WHO Grading 1973	0.366	0.43003			Dropped variables: p>0.10
TLS Amount	0.222	0.60031
Blood Vessel Invasion	0.218	0.6053
MDACC-Panel	0.174	0.67015
Lymphovascular Invasion	0.151	0.70572
CIS	0.086	0.82104
3) Step Three: Forward selection of significant variables from multivariable analysis (step 2 model) and non-significant variables from univariable analysis (step 1)
Multivariable Cox-Regression: Events (n): 72; Censorings (n): 63; Total (n): 135
Source	LogWorth	PValue	AICc	BIC
TLS Distance	5.369	0	591.106	618.385	Included Variables: p≤0.10
pN-Stage	3.052	0.00089
pT-Stage	2.879	0.00132
Adjuvant chemotherapy	0.819	0.15166			Dropped variables: p>0.10
Gender	0.39	0.40778
Age	0.363	0.43306
Resection margin	0.139	0.72574
4) Step four: Fitting of the final multivariable Model
Multivariable Cox-Regression: Events (n): 72; Censorings (n): 63; Total (n): 135
					Effect Likelihood Ratio Tests				Effect Wald Tests
Source	LogWorth	PValue	AICc	BIC	Nparm	DF	L-R ChiSquare	Prob>ChiSq	Nparm	DF	Wald ChiSquare	Prob>ChiSq
TLS Distance	5.062	1e-05	585.076	601.852	2	2	23.3093	<.0001*	2	2	20.5992	<.0001*
pT-Stage	2.785	0.00164			2	2	12.8245	0.0016*	2	2	13.6025	0.0011*
pN-Stage	2.721	0.0019			2	2	12.5289	0.0019*	2	2	12.978	0.0015*
Model	-LogLikelihood	ChiSquare	DF	Prob>Chisq
Difference	27.469	54.9379	6	<.0001*
Full	286.21
Reduced	313.679
Parameter Estimates
Term	Estimate	Std Error	Lower 95%	Upper 95%
pN-Stage[pN+]	0.230854	0.200808	-0.169666	0.621314
pN-Stage[pN0]	-0.6228486	0.173367	-0.961958	-0.279411
pT-Stage[pT3-pT2]	0.416716	0.310479	-0.176264	1.04965
pT-Stage[pT4-pT3]	0.799662	0.283906	0.233241	1.35196
TLS Distance[<129.5 micrometer]	-0.8192273	0.23532	-1.318749	-0.386438
TLS Distance[>=129.5 micrometer]	0.00402761	0.195762	-0.38841	0.384891
Mutlivariable Hazard Ratios
pT-Stage
Level1	/Level2	Hazard Ratio	Prob>Chisq	Lower 95%	Upper 95%
pT3	pT2	1.51697	0.1711	0.838397	2.85664
pT4	pT2	3.37494	0.0004*	1.72261	6.75923
pT4	pT3	2.22479	0.0062*	1.26269	3.86498
pT2	pT3	0.659208	0.1711	0.350061	1.19275
pT2	pT4	0.296301	0.0004*	0.147946	0.580514
pT3	pT4	0.449481	0.0062*	0.258734	0.791963
pN-Stage
Level1	/Level2	Hazard Ratio	Prob>Chisq	Lower 95%	Upper 95%
pN0	pN+	0.425835	0.0051*	0.239501	0.768801
pNX	pN+	1.17485	0.6855	0.528018	2.52396
pNX	pN0	2.75893	0.0078*	1.32712	5.39941
pN+	pN0	2.34832	0.0051*	1.30073	4.17534
pN+	pNX	0.851172	0.6855	0.396203	1.89387
pN0	pNX	0.362459	0.0078*	0.185205	0.753512
TLS Distance
Level1	/Level2	Hazard Ratio	Prob>Chisq	Lower 95%	Upper 95%
>=129.5 micrometer	<129.5 micrometer	2.2779	0.0299*	1.08214	5.11092
TLS absent	<129.5 micrometer	5.12652	<.0001*	2.54721	11.2607
TLS absent	>=129.5 micrometer	2.25054	0.0055*	1.26569	4.11948
<129.5 micrometer	>=129.5 micrometer	0.439	0.0299*	0.195659	0.924098
<129.5 micrometer	TLS absent	0.195064	<.0001*	0.088804	0.392586
>=129.5 micrometer	TLS absent	0.444337	0.0055*	0.242749	0.790083

## Sheet: Fig_S2D_TLS_Amount
Ad Figure S2D: Multivariable Cox Regression - Amount of Tertiary lymphoid structures (TLS).
Median potential follow-up time (months)
Group	Median Time	Lower 95%-CI	Upper 95%-CI	25% Failures	75% Failures
Absent	86.83	63.77	122.47	67.63	122.47
TLS Amount (n)<4	79.93	9.83	81.9	32	81.9
TLS Amount (n)>=4	67.87	45.73	78.27	26.47	89
Combined	77.53	63.77	81.4	32.4	95.63
Model Selection:
1) Step One: Univariable Cox-Regressions
Source	LogWorth	PValue	AICc	BIC
TLS Amount	4.18	7e-05	612.2	617.92	Included Variables: p≤0.20
pN-Stage	4.302	5e-05	611.638	617.357
pT-Stage	3.506	0.00031	615.302	621.022
Lymphovascular Invasion	2.367	0.00429	621.233	624.108
WHO Grading 1973	1.34	0.04568	625.395	628.27
Perineural Sheath Invasion	1.02	0.0956	626.611	629.486
MDACC-Panel	1.009	0.09804	627.245	635.777
Blood Vessel Invasion	0.99	0.10233	626.719	629.595
CIS	0.757	0.17507	627.549	630.424
Adjuvant chemotherapy	0.59	0.25707	628.104	630.979	Dropped variables: p>0.20
Gender	0.554	0.27926	628.218	631.093
Age	0.297	0.5045	628.943	631.818
Resection margin	0.11	0.77671	629.308	632.183
WHO Grading 2016	0	1	All tumors were high grade (no parameter estimation possible)
2) Step Two: Backward selection; Multivariable Cox-Regression of included variables with p≤0.20 derived by univariable Cox-Regression
Multivariable Cox-Regression: Events (n): 72; Censorings (n): 63; Total (n): 135
Source	LogWorth	PValue	AICc	BIC
TLS Amount	4.278	5e-05	600.692	637.866	Included Variables: p≤0.10
pN-Stage	2.228	0.00591
pT-Stage	2.096	0.00801
Perineural Sheath Invasion	0.97	0.10726			Dropped variables: p>0.10
MDACC-Panel	0.339	0.45865
WHO Grading 1973	0.282	0.52296
Blood Vessel Invasion	0.279	0.52561
Lymphovascular Invasion	0.103	0.78817
CIS	0.063	0.8658
3) Step Three: Forward selection of significant variables from multivariable analysis (step 2 model) and non-significant variables from univariable analysis (step 1)
Multivariable Cox-Regression: Events (n): 72; Censorings (n): 63; Total (n): 135
Source	LogWorth	PValue	AICc	BIC
TLS Amount	4.228	6e-05	596.36	623.639	Included Variables: p≤0.10
pN-Stage	3.12	0.00076
pT-Stage	3.015	0.00097
Adjuvant chemotherapy	0.788	0.16276			Dropped variables: p>0.10
Age	0.345	0.45171
Gender	0.231	0.5874
Resection margin	0.077	0.83772
4) Step four: Fitting of the final multivariable Model
Multivariable Cox-Regression: Events (n): 72; Censorings (n): 63; Total (n): 135
					Effect Likelihood Ratio Tests				Effect Wald Tests
Source	LogWorth	PValue	AICc	BIC	Nparm	DF	L-R ChiSquare	Prob>ChiSq	Nparm	DF	Wald ChiSquare	Prob>ChiSq
TLS Amount	4.04	9e-05	589.779	606.554	2	2	18.6069	<.0001*	2	2	18.5021	<.0001*
pT-Stage	2.942	0.00114			2	2	13.5507	0.0011*	2	2	14.3306	0.0008*
pN-Stage	2.796	0.0016			2	2	12.8775	0.0016*	2	2	13.4542	0.0012*
Model	-LogLikelihood	ChiSquare	DF	Prob>Chisq
Difference	25.1178	50.2356	6	<.0001*
Full	288.561
Reduced	313.679
Parameter Estimates
Term	Estimate	Std Error	Lower 95%	Upper 95%
TLS Amount[Absent]	0.785305	0.200056	0.402353	1.19179
TLS Amount[TLS Amount (n)<4]	-0.4200156	0.279664	-1.025622	0.0864486
pN-Stage[pN+]	0.242087	0.20172	-0.161005	0.633534
pN-Stage[pN0]	-0.636161	0.174037	-0.975895	-0.290799
pT-Stage[pT3-pT2]	0.452488	0.309383	-0.138206	1.08348
pT-Stage[pT4-pT3]	0.789698	0.280812	0.228777	1.33545
Mutlivariable Hazard Ratios
pT-Stage
Level1	/Level2	Hazard Ratio	Prob>Chisq	Lower 95%	Upper 95%
pT3	pT2	1.57222	0.1352	0.870919	2.95494
pT4	pT2	3.46318	0.0003*	1.78211	6.88303
pT4	pT3	2.20273	0.0063*	1.25706	3.80172
pT2	pT3	0.636043	0.1352	0.338416	1.14821
pT2	pT4	0.288752	0.0003*	0.145285	0.561133
pT3	pT4	0.453982	0.0063*	0.263039	0.795506
pN-Stage
Level1	/Level2	Hazard Ratio	Prob>Chisq	Lower 95%	Upper 95%
pN0	pN+	0.41551	0.0043*	0.233689	0.753587
pNX	pN+	1.16414	0.7037	0.521708	2.51267
pNX	pN0	2.80172	0.0072*	1.3443	5.50337
pN+	pN0	2.40668	0.0043*	1.32699	4.27918
pN+	pNX	0.859	0.7037	0.397982	1.91678
pN0	pNX	0.356923	0.0072*	0.181707	0.74388
TLS Amount
Level1	/Level2	Hazard Ratio	Prob>Chisq	Lower 95%	Upper 95%
TLS Amount (n)<4	Absent	0.299596	0.0028*	0.116128	0.675669
TLS Amount (n)>=4	Absent	0.316449	<.0001*	0.178829	0.549676
TLS Amount (n)>=4	TLS Amount (n)<4	1.05625	0.9011	0.465419	2.70944
Absent	TLS Amount (n)<4	3.33783	0.0028*	1.48002	8.61122
Absent	TLS Amount (n)>=4	3.16007	<.0001*	1.81925	5.59195
TLS Amount (n)<4	TLS Amount (n)>=4	0.946744	0.9011	0.36908	2.1486
